# Supplementary material for: The Neisseria gonorrhoeae Accessory Genome and Its Association with the Core Genome and Antimicrobial Resistance
Source: PubMed Central journal article supplement (PMC9241924; doi:10.1128/spectrum.02654-21), 2022-05-23
Supplement: spectrum.02654-21-s001.pdf [file spectrum.02654-21-s001.pdf]

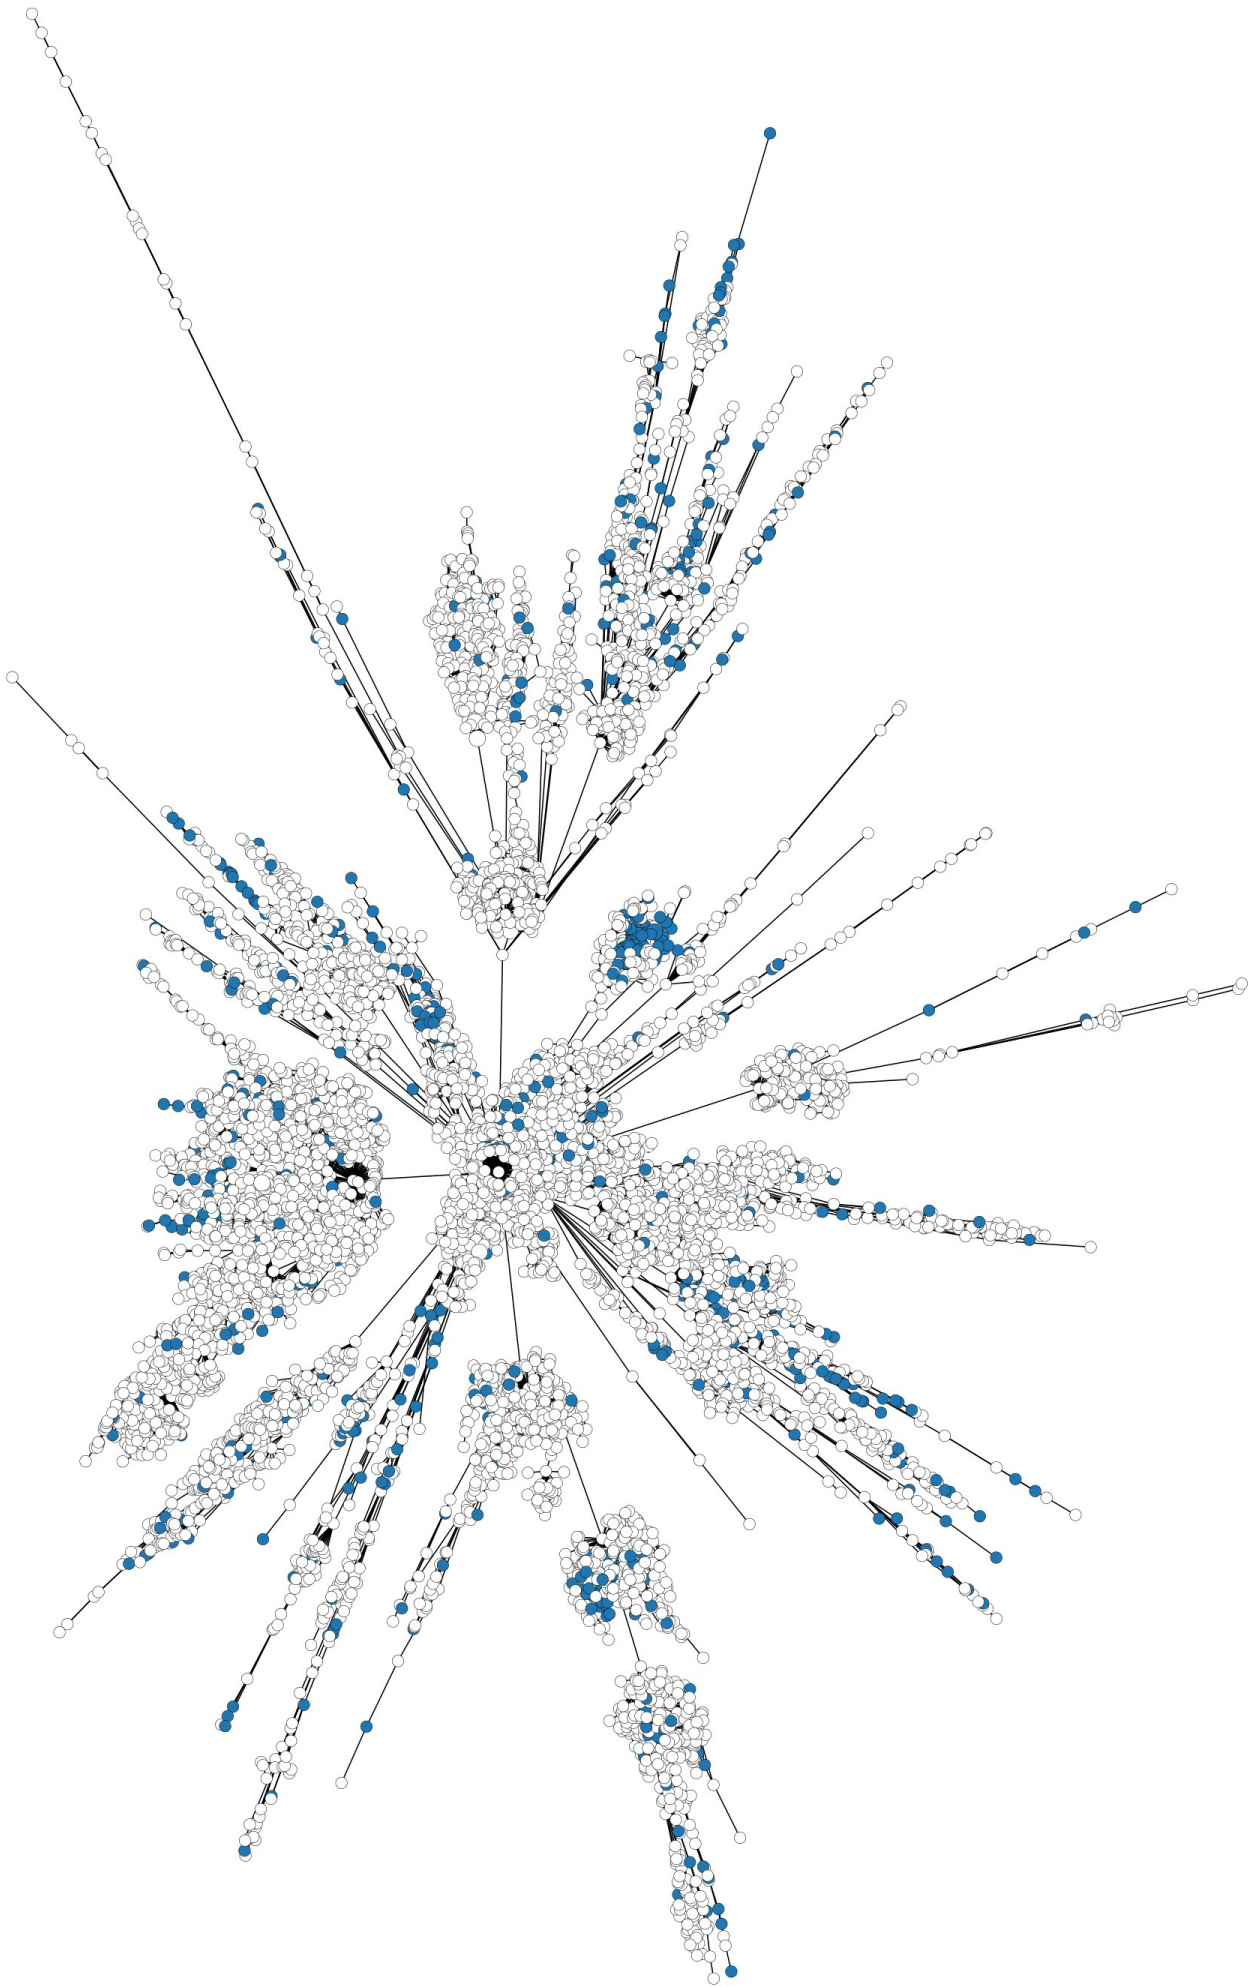

**Figure S1. Minimum-spanning tree based on *N. gonorrhoeae* cgMLST v1.0 typing scheme including all 8,013 *Neisseria gonorrhoeae* isolates available in PubMLST. The 765 isolates included in the representative subset of isolates used for accessory genome characterization are colored in blue. The blue nodes are distributed throughout the tree consistent with heterogeneous, non-biased sampling. The tree was created with GrapeTree and nodes were positioned through dynamic rendering, meaning that branch lengths are not scaled.**

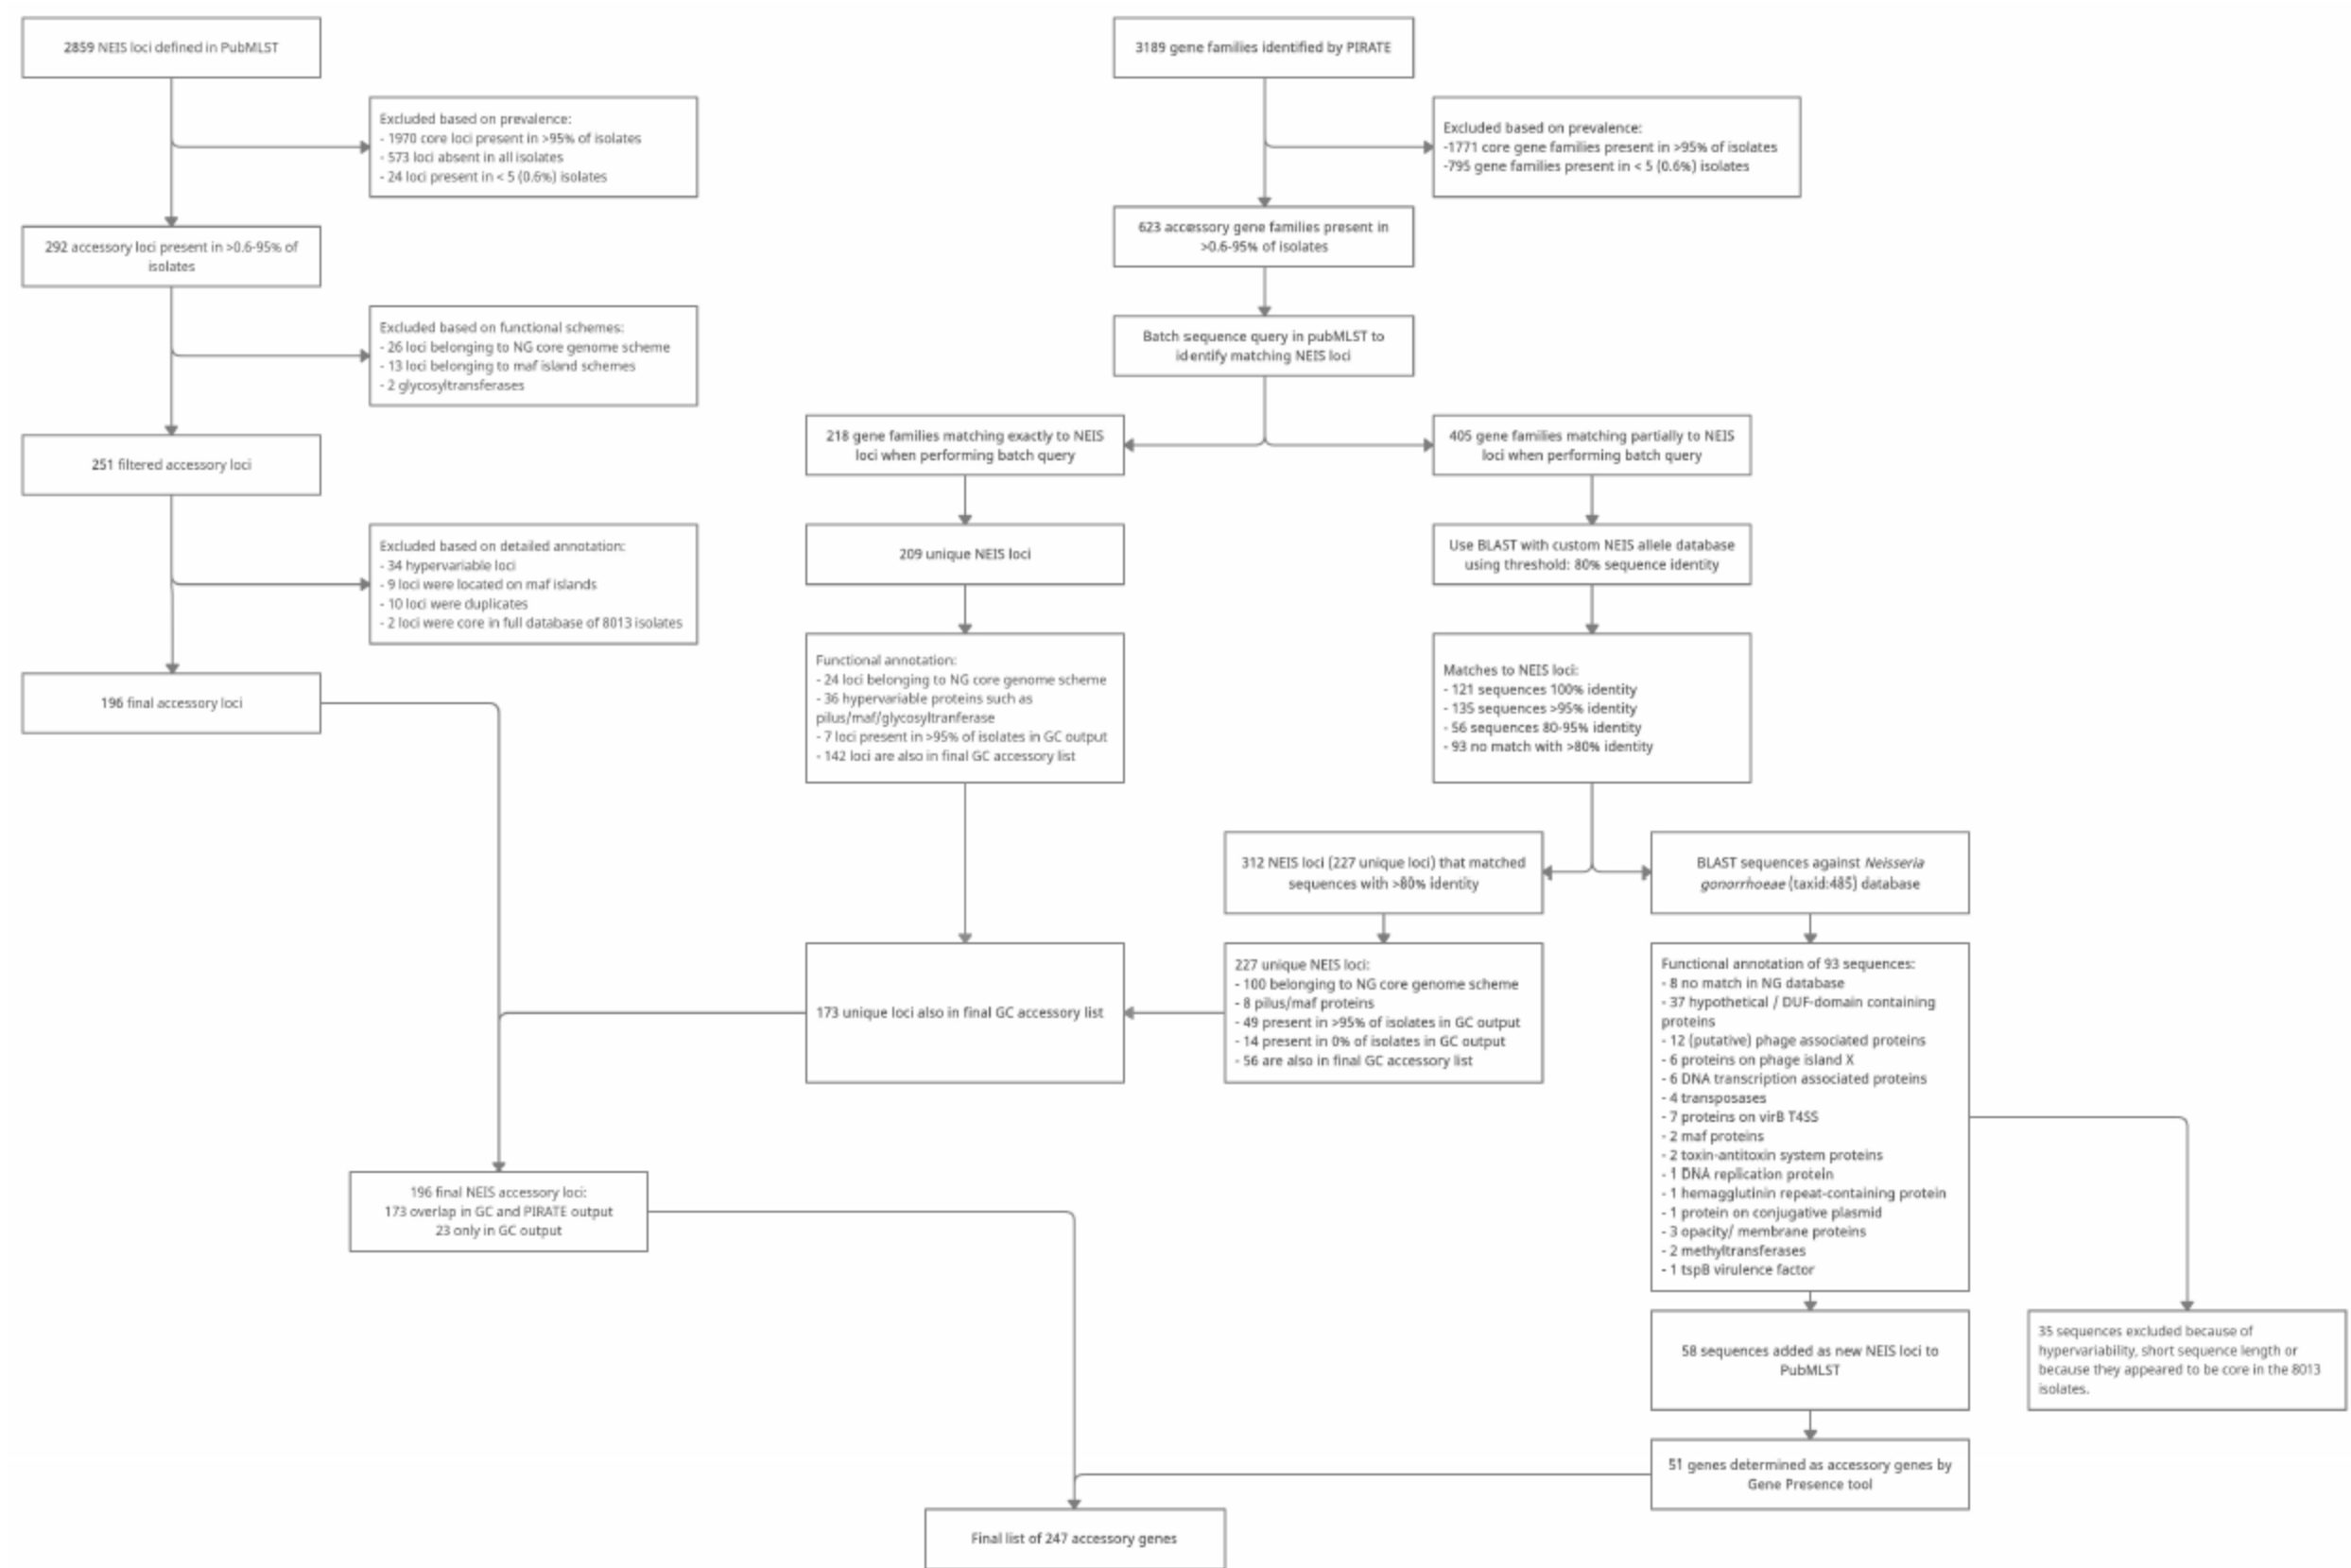

Figure S2. Detailed workflow and results of each filtering step during accessory genome identification.

**Table S1. Isolate characteristics**

| <b>PubMLST ID</b> | <b>Country</b>    | <b>Continent</b> | <b>Year of isolation</b> | <b>MLST</b> | <b>NG-MAST v2.0</b> | <b>Core genome group</b> |
|-------------------|-------------------|------------------|--------------------------|-------------|---------------------|--------------------------|
| 27235             | USA               | North America    | 2009                     | 1583        | 766                 | 17                       |
| 27270             | USA               | North America    | 2009                     | 6722        | 19326               | 22                       |
| 27302             | USA               | North America    | 2009                     | 10315       | 1103                | 3                        |
| 27327             | USA               | North America    | 2009                     | 1901        | 225                 | 18                       |
| 27353             | USA               | North America    | 2009                     | 1579        | 286                 | 3                        |
| 27364             | USA               | North America    | 2009                     | 1582        | 4424                | 32                       |
| 27467             | USA               | North America    | 2009                     | 8110        | 2265                | 3                        |
| 27471             | USA               | North America    | 2009                     | 10316       | 7468                | 420                      |
| 31458             | Norway            | Europe           | 2009                     | 1901        | 3149                | 3                        |
| 31463             | Germany           | Europe           | 2008                     | 1901        | 3698                | 18                       |
| 31464             | Greece            | Europe           | 2008                     | 11173       | 2272                | 416                      |
| 31470             | Belarus           | Europe           | 2009                     | 11174       | 2873                | 425                      |
| 31477             | Belarus           | Europe           | 2009                     | 8126        | 1929                | 16                       |
| 31480             | Estonia           | Europe           | 2010                     | 1588        | 211                 | 21                       |
| 31482             | Estonia           | Europe           | 2010                     | 1594        | 7485                | 414                      |
| 31487             | Belarus           | Europe           | 2010                     | 1595        | 7436                | 427                      |
| 31496             | Slovenia          | Europe           | 2010                     | 10241       | 5616                | 429                      |
| 31499             | Estonia           | Europe           | 2011                     | 11175       | 1241                | 428                      |
| 31510             | Slovenia          | Europe           | 2011                     | 7823        | 5405                | 133                      |
| 31512             | Estonia           | Europe           | 2012                     | 6726        | 19335               | 431                      |
| 31522             | China             | Asia             | 1998                     | 1580        | 1085                | 56                       |
| 31524             | China             | Asia             | 1998                     | 7360        | 16120               | 18                       |
| 31525             | China [Hong Kong] | Asia             | 1998                     | 11077       | 16139               | 432                      |
| 31526             | Indonesia         | Asia             | 1998                     | 6715        | 1691                | 433                      |
| 31527             | Malaysia          | Asia             | 1998                     | 1582        | 147                 | 416                      |
| 31529             | Philippines       | Asia             | 1998                     | 1583        | 1083                | 389                      |
| 31533             | Thailand          | Asia             | 1998                     | 7371        | 10855               | 306                      |
| 31535             | Thailand          | Asia             | 1998                     | 1583        | 16141               | 307                      |
| 31544             | India             | Asia             | 2009                     | 1600        | 6074                | 436                      |
| 31545             | India             | Asia             | 2010                     | 11180       | 6082                | 71                       |
| 31547             | India             | Asia             | 2010                     | 11181       | 6073                | 437                      |
| 31548             | Bhutan            | Asia             | 2010                     | 8776        | 6064                | 390                      |
| 31553             | Cuba              | North America    | 1998                     | 11182       | 16131               | 75                       |
| 31554             | Cuba              | North America    | 1998                     | 11183       | 16115               | 76                       |
| 31556             | Cuba              | North America    | 1998                     | 11184       | 16134               | 308                      |
| 31557             | Jamaica           | North America    | 1998                     | 11185       | 545                 | 78                       |
| 31559             | Brazil            | South America    | 2008                     | 1583        | 3791                | 440                      |
| 31561             | Ecuador           | South America    | 2008                     | 11186       | 3771                | 81                       |
| 31566             | USA               | North America    | 1999                     | 8127        | 3305                | 16                       |

|       |                 |         |      |       |       |     |
|-------|-----------------|---------|------|-------|-------|-----|
| 31568 | UK              | Europe  | 1986 | 1931  | 6207  | 84  |
| 31572 | UK              | Europe  | 1990 | 1906  | 8     | 442 |
| 31573 | UK              | Europe  | 1993 | 8152  | 170   | 443 |
| 31574 | UK              | Europe  | 1993 | 11181 | 175   | 311 |
| 31575 | UK              | Europe  | 1993 | 10899 | 176   | 411 |
| 31577 | UK              | Europe  | 1993 | 1920  | 178   | 444 |
| 31578 | Denmark         | Europe  | 1998 | 1579  | 21    | 24  |
| 31581 | Greece          | Europe  | 1998 | 1902  | 495   | 42  |
| 31582 | Norway          | Europe  | 1998 | 1591  | 16133 | 445 |
| 31584 | Poland          | Europe  | 1998 | 1601  | 16116 | 426 |
| 31586 | Russia          | Asia    | 1998 | 11188 | 807   | 90  |
| 31587 | Russia          | Asia    | 1998 | 9903  | 19336 | 90  |
| 31590 | Spain           | Europe  | 1998 | 1595  | 8     | 442 |
| 31593 | Spain           | Europe  | 1999 | 1580  | 64    | 16  |
| 31594 | The Netherlands | Europe  | 1999 | 12078 | 277   | 90  |
| 31598 | Russia          | Asia    | 2004 | 6810  | 1532  | 447 |
| 31604 | Denmark         | Europe  | 2008 | 1893  | 3766  | 31  |
| 31608 | Poland          | Europe  | 2008 | 11189 | 3798  | 448 |
| 31612 | Turkey          | Asia    | 2008 | 11177 | 1993  | 430 |
| 31627 | Estonia         | Europe  | 2009 | 8776  | 7483  | 449 |
| 31631 | Slovenia        | Europe  | 2009 | 1901  | 225   | 18  |
| 31633 | Belarus         | Europe  | 2010 | 10631 | 7476  | 3   |
| 31637 | Poland          | Europe  | 2010 | 1898  | 5421  | 21  |
| 31639 | Poland          | Europe  | 2010 | 7363  | 8376  | 315 |
| 31646 | Poland          | Europe  | 2011 | 9363  | 8390  | 16  |
| 31651 | Slovenia        | Europe  | 2011 | 8131  | 8658  | 42  |
| 31654 | Estonia         | Europe  | 2012 | 1931  | 7487  | 303 |
| 31655 | Estonia         | Europe  | 2012 | 1892  | 5185  | 425 |
| 31662 | Thailand        | Asia    | 1979 | 1920  | 172   | 451 |
| 31663 | Australia       | Oceania | 1992 | 7367  | 3304  | 95  |
| 31665 | Australia       | Oceania | 1996 | 1599  | 904   | 101 |
| 31666 | Australia       | Oceania | 1997 | 1890  | 270   | 452 |
| 31669 | China           | Asia    | 1998 | 11193 | 16138 | 57  |
| 31670 | Indonesia       | Asia    | 1998 | 7365  | 16121 | 317 |
| 31671 | Malaysia        | Asia    | 1998 | 7367  | 8804  | 83  |
| 31672 | Philippines     | Asia    | 1998 | 11194 | 16124 | 104 |
| 31673 | Philippines     | Asia    | 1998 | 10634 | 16126 | 60  |
| 31674 | Thailand        | Asia    | 1998 | 11195 | 16140 | 105 |
| 31675 | Thailand        | Asia    | 1998 | 1583  | 3427  | 106 |
| 31676 | Thailand        | Asia    | 1998 | 11196 | 16142 | 107 |
| 31677 | Thailand        | Asia    | 1998 | 8143  | 3032  | 416 |
| 31678 | Thailand        | Asia    | 1998 | 11197 | 16143 | 108 |

|       |               |               |      |       |       |     |
|-------|---------------|---------------|------|-------|-------|-----|
| 31686 | USA           | North America | 2009 | 10311 | 19337 | 418 |
| 31688 | Thailand      | Asia          | 1999 | 1582  | 16119 | 454 |
| 31689 | Thailand      | Asia          | 1999 | 1601  | 3031  | 392 |
| 31690 | Thailand      | Asia          | 1999 | 7369  | 16135 | 393 |
| 31701 | India         | Asia          | 2007 | 11199 | 6348  | 455 |
| 31702 | China         | Asia          | 2008 | 10314 | 3777  | 3   |
| 31703 | China         | Asia          | 2008 | 6715  | 3755  | 133 |
| 31705 | Indonesia     | Asia          | 2008 | 1891  | 201   | 394 |
| 31707 | Philippines   | Asia          | 2008 | 11200 | 3754  | 456 |
| 31708 | Thailand      | Asia          | 2008 | 11201 | 3759  | 21  |
| 31709 | India         | Asia          | 2009 | 12079 | 19338 | 458 |
| 31711 | India         | Asia          | 2009 | 8134  | 6091  | 37  |
| 31715 | Pakistan      | Asia          | 2009 | 1903  | 368   | 37  |
| 31716 | Pakistan      | Asia          | 2009 | 11074 | 6095  | 37  |
| 31721 | India         | Asia          | 2010 | 1927  | 6085  | 460 |
| 31722 | India         | Asia          | 2010 | 6813  | 6086  | 461 |
| 31723 | India         | Asia          | 2010 | 11191 | 368   | 124 |
| 31724 | India         | Asia          | 2010 | 11204 | 6057  | 125 |
| 31726 | Bhutan        | Asia          | 2010 | 11205 | 6061  | 462 |
| 31735 | Pakistan      | Asia          | 2011 | 1599  | 6319  | 127 |
| 31740 | Japan         | Asia          | 2001 | 1596  | 8132  | 8   |
| 31745 | Germany       | Europe        | 1998 | 11207 | 12970 | 409 |
| 31755 | Australia     | Oceania       | 2004 | 7365  | 1257  | 64  |
| 31756 | Japan         | Asia          | 2001 | 7363  | 4091  | 130 |
| 31758 | Australia     | Oceania       | 2007 | 1903  | 621   | 64  |
| 31760 | Vietnam       | Asia          | 2008 | 9364  | 3770  | 21  |
| 31764 | Australia     | Oceania       | 2001 | 1583  | 556   | 132 |
| 31766 | Thailand      | Asia          | 2008 | 11210 | 2233  | 416 |
| 31768 | Russia        | Asia          | 2004 | 8160  | 758   | 16  |
| 31769 | Thailand      | Asia          | 2008 | 1925  | 3761  | 416 |
| 31779 | Thailand      | Asia          | 2008 | 8145  | 3796  | 320 |
| 31787 | Italy         | Europe        | 1998 | 1584  | 685   | 41  |
| 31796 | Thailand      | Asia          | 2008 | 8112  | 1458  | 135 |
| 31797 | New Zealand   | Oceania       | 2004 | 8122  | 210   | 446 |
| 31798 | France        | Europe        | 1998 | 12080 | 132   | 465 |
| 31799 | Russia        | Asia          | 2004 | 6810  | 1525  | 466 |
| 31801 | Germany       | Europe        | 2008 | 10622 | 3760  | 467 |
| 31802 | UK [Scotland] | Europe        | 2005 | 8148  | 210   | 468 |
| 31805 | Russia        | Asia          | 2004 | 1905  | 1517  | 469 |
| 31812 | Russia        | Asia          | 2004 | 11212 | 1538  | 142 |
| 31814 | India         | Asia          | 2008 | 8775  | 6058  | 459 |
| 31815 | Indonesia     | Asia          | 1998 | 1931  | 16122 | 143 |

|       |                 |               |      |       |       |     |
|-------|-----------------|---------------|------|-------|-------|-----|
| 31817 | The Netherlands | Europe        | 1998 | 11188 | 16151 | 144 |
| 31946 | Pakistan        | Asia          | 2011 | 11228 | 6079  | 146 |
| 31952 | Vietnam         | Asia          | 2011 | 10313 | 7724  | 263 |
| 31953 | Vietnam         | Asia          | 2011 | 1600  | 7154  | 148 |
| 31954 | Vietnam         | Asia          | 2011 | 11230 | 7741  | 133 |
| 31955 | Vietnam         | Asia          | 2011 | 11231 | 4676  | 149 |
| 31968 | South Africa    | Africa        | 1991 | 11234 | 182   | 473 |
| 31969 | South Africa    | Africa        | 1991 | 10899 | 183   | 474 |
| 31971 | Cape Verde      | Africa        | 1998 | 1583  | 758   | 475 |
| 31972 | Cape Verde      | Africa        | 1998 | 1931  | 16146 | 155 |
| 31974 | The Gambia      | Africa        | 1998 | 8139  | 3187  | 156 |
| 31976 | Morocco         | Africa        | 1998 | 1583  | 1247  | 90  |
| 31977 | Morocco         | Africa        | 1998 | 11235 | 16147 | 157 |
| 31978 | Tanzania        | Africa        | 1998 | 12082 | 16148 | 476 |
| 31979 | Uganda          | Africa        | 1999 | 8142  | 16127 | 477 |
| 31981 | The Gambia      | Africa        | 1999 | 1585  | 231   | 44  |
| 31982 | Guinea          | Africa        | 1999 | 12083 | 16128 | 478 |
| 31983 | Morocco         | Africa        | 1999 | 7363  | 16129 | 479 |
| 31986 | Guinea-Bissau   | Africa        | 2007 | 1603  | 3187  | 156 |
| 31994 | Guinea-Bissau   | Africa        | 2007 | 11236 | 783   | 480 |
| 31996 | Guinea-Bissau   | Africa        | 2007 | 11240 | 3179  | 481 |
| 31997 | Guinea-Bissau   | Africa        | 2007 | 11241 | 3377  | 481 |
| 31998 | Guinea-Bissau   | Africa        | 2007 | 8123  | 3180  | 327 |
| 31999 | Guinea-Bissau   | Africa        | 2007 | 8161  | 5302  | 166 |
| 32002 | Guinea-Bissau   | Africa        | 2007 | 11242 | 3183  | 481 |
| 32010 | Guinea-Bissau   | Africa        | 2007 | 11244 | 3376  | 155 |
| 32011 | Guinea-Bissau   | Africa        | 2007 | 12084 | 3182  | 482 |
| 32074 | Saudi Arabia    | Asia          | 1998 | 7363  | 16150 | 184 |
| 32076 | UK              | Europe        | 2002 | 1892  | 261   | 489 |
| 37029 | USA             | North America | 2007 | 11411 | 19361 | 435 |
| 37100 | USA             | North America | 2012 | 11412 | 19364 | 31  |
| 37108 | USA             | North America | 2012 | 12007 | 19103 | 446 |
| 37122 | USA             | North America | 2006 | 10935 | 19369 | 78  |
| 37124 | USA             | North America | 2007 | 1579  | 19371 | 18  |
| 37125 | USA             | North America | 2007 | 11413 | 1318  | 198 |
| 37142 | USA             | North America | 2011 | 8149  | 9103  | 506 |
| 37143 | USA             | North America | 2011 | 8136  | 5256  | 416 |
| 37161 | USA             | North America | 2011 | 1582  | 19375 | 200 |
| 37167 | USA             | North America | 2011 | 12087 | 10639 | 31  |
| 37171 | USA             | North America | 2011 | 11414 | 5276  | 507 |
| 37177 | USA             | North America | 2011 | 12088 | 7117  | 3   |
| 37186 | USA             | North America | 2012 | 12089 | 19378 | 415 |

|       |           |               |      |       |       |     |
|-------|-----------|---------------|------|-------|-------|-----|
| 37188 | USA       | North America | 2012 | 12090 | 19134 | 509 |
| 37190 | USA       | North America | 2012 | 10316 | 5618  | 507 |
| 37191 | USA       | North America | 2012 | 6962  | 8223  | 421 |
| 37196 | USA       | North America | 2012 | 1889  | 19380 | 31  |
| 37197 | USA       | North America | 2012 | 11415 | 19381 | 204 |
| 37198 | USA       | North America | 2012 | 1920  | 19114 | 418 |
| 37203 | USA       | North America | 2012 | 11184 | 752   | 335 |
| 37205 | USA       | North America | 2012 | 7828  | 8420  | 510 |
| 37251 | USA       | North America | 2006 | 1590  | 19391 | 505 |
| 37265 | USA       | North America | 2007 | 12091 | 5     | 24  |
| 37307 | USA       | North America | 2005 | 12092 | 19397 | 44  |
| 37327 | USA       | North America | 2005 | 1590  | 19400 | 512 |
| 37357 | USA       | North America | 2007 | 1932  | 19096 | 336 |
| 37377 | USA       | North America | 2008 | 10241 | 19120 | 3   |
| 37390 | USA       | North America | 2009 | 8130  | 758   | 25  |
| 37396 | USA       | North America | 2010 | 11418 | 19110 | 41  |
| 37404 | USA       | North America | 2011 | 1600  | 8503  | 196 |
| 37405 | USA       | North America | 2011 | 11419 | 9246  | 416 |
| 37413 | USA       | North America | 2011 | 7828  | 1614  | 211 |
| 37457 | USA       | North America | 2011 | 7363  | 7574  | 196 |
| 37492 | USA       | North America | 2013 | 8149  | 8247  | 513 |
| 37536 | USA       | North America | 2013 | 7363  | 13479 | 196 |
| 37547 | USA       | North America | 2013 | 11423 | 10941 | 17  |
| 45019 | Australia | Oceania       | 2011 | 7363  | 10103 | 521 |
| 45022 | Australia | Oceania       | 2011 | 8145  | 436   | 234 |
| 45031 | Australia | Oceania       | 2011 | 1901  | 225   | 18  |
| 45032 | Australia | Oceania       | 2013 | 12041 | 10125 | 524 |
| 45037 | Australia | Oceania       | 2012 | 7360  | 1407  | 3   |
| 45042 | Australia | Oceania       | 2013 | 1890  | 8842  | 21  |
| 45050 | Australia | Oceania       | 2012 | 1924  | 10105 | 227 |
| 45051 | Australia | Oceania       | 2012 | 12045 | 758   | 520 |
| 45057 | Australia | Oceania       | 2012 | 12042 | 9716  | 522 |
| 45061 | Australia | Oceania       | 2013 | 7363  | 10117 | 525 |
| 45062 | Australia | Oceania       | 2013 | 12044 | 19435 | 526 |
| 45063 | Australia | Oceania       | 2013 | 12046 | 8063  | 520 |
| 45069 | Australia | Oceania       | 2013 | 10317 | 5268  | 41  |
| 45071 | Australia | Oceania       | 2013 | 8156  | 7268  | 17  |
| 45075 | Australia | Oceania       | 2013 | 7359  | 4186  | 223 |
| 45330 | Australia | Oceania       | 2013 | 8149  | 10120 | 527 |
| 46853 | Norway    | Europe        | 2015 | 12459 | 11745 | 241 |
| 46858 | Norway    | Europe        | 2015 | 12460 | 18917 | 416 |
| 46868 | Norway    | Europe        | 2016 | 12461 | 8561  | 62  |

|       |              |        |      |       |       |     |
|-------|--------------|--------|------|-------|-------|-----|
| 46875 | Norway       | Europe | 2016 | 13923 | 19245 | 425 |
| 46876 | Norway       | Europe | 2016 | 12000 | 12433 | 196 |
| 46887 | Norway       | Europe | 2016 | 9900  | 18926 | 133 |
| 46889 | Norway       | Europe | 2015 | 14333 | 292   | 446 |
| 46897 | Norway       | Europe | 2015 | 8776  | 9983  | 236 |
| 46902 | Norway       | Europe | 2015 | 11985 | 568   | 133 |
| 46908 | Norway       | Europe | 2016 | 9362  | 2992  | 16  |
| 46910 | Norway       | Europe | 2016 | 8774  | 18930 | 529 |
| 46923 | Norway       | Europe | 2016 | 13924 | 2992  | 16  |
| 46924 | Norway       | Europe | 2016 | 14334 | 18933 | 18  |
| 46926 | Norway       | Europe | 2016 | 8136  | 18934 | 530 |
| 46939 | Norway       | Europe | 2016 | 14332 | 18937 | 96  |
| 46949 | Norway       | Europe | 2016 | 10316 | 12496 | 251 |
| 46957 | Norway       | Europe | 2016 | 14335 | 18941 | 96  |
| 46960 | Norway       | Europe | 2016 | 11750 | 18940 | 254 |
| 46962 | Norway       | Europe | 2016 | 1579  | 18944 | 344 |
| 47751 | UK [England] | Europe | 2014 | 7822  | 4995  | 133 |
| 47758 | UK [England] | Europe | 2014 | 11420 | 3935  | 16  |
| 47776 | UK [England] | Europe | 2014 | 1583  | 217   | 538 |
| 48622 | UK [England] | Europe | 2009 | 11990 | 51    | 414 |
| 48644 | UK [England] | Europe | 2009 | 1931  | 19089 | 350 |
| 48650 | UK [England] | Europe | 2008 | 7826  | 2487  | 223 |
| 48655 | UK [England] | Europe | 2010 | 7363  | 2400  | 196 |
| 48701 | UK [England] | Europe | 2007 | 1892  | 7344  | 540 |
| 48708 | UK [England] | Europe | 2007 | 1901  | 19478 | 18  |
| 48727 | UK [England] | Europe | 2010 | 8775  |       | 274 |
| 48741 | UK [England] | Europe | 2010 | 10622 | 1730  | 528 |
| 48748 | UK [England] | Europe | 2010 | 8163  | 2     | 439 |
| 48758 | UK [England] | Europe | 2009 | 11417 | 2992  | 16  |
| 48769 | UK [England] | Europe | 2005 | 8114  | 4     | 44  |
| 48844 | UK [England] | Europe | 2004 | 8148  | 210   | 468 |
| 48851 | UK [England] | Europe | 2004 | 1587  | 1186  | 208 |
| 48884 | UK [England] | Europe | 2004 | 1904  | 748   | 510 |
| 48891 | UK [England] | Europe | 2005 | 12529 | 766   | 17  |
| 48902 | UK [England] | Europe | 2004 | 8392  | 377   | 486 |
| 48947 | UK [England] | Europe | 2004 | 6960  | 709   | 541 |
| 49169 | UK [England] | Europe | 2009 | 12533 | 19485 | 16  |
| 49188 | UK [England] | Europe | 2007 | 12508 | 3     | 439 |
| 49194 | UK [England] | Europe | 2007 | 1918  | 785   | 415 |
| 49201 | UK [England] | Europe | 2009 | 1600  | 19486 | 16  |
| 50479 | Norway       | Europe | 2016 | 14336 | 8953  | 3   |
| 50488 | Norway       | Europe | 2016 | 14337 | 18951 | 239 |



|       |        |               |      |       |       |     |
|-------|--------|---------------|------|-------|-------|-----|
| 50491 | Norway | Europe        | 2016 | 11249 | 18952 | 21  |
| 51116 | Norway | Europe        | 2016 | 13590 | 9158  | 3   |
| 51661 | Norway | Europe        | 2017 | 11367 | 377   | 542 |
| 51675 | Norway | Europe        | 2017 | 13252 | 15257 | 96  |
| 51685 | Norway | Europe        | 2017 | 13266 | 11421 | 62  |
| 51688 | Norway | Europe        | 2017 | 7827  | 15188 | 21  |
| 51699 | Norway | Europe        | 2017 | 11999 | 995   | 16  |
| 51705 | Norway | Europe        | 2017 | 13142 | 1691  | 62  |
| 51707 | Norway | Europe        | 2017 | 8135  | 10676 | 425 |
| 51711 | Norway | Europe        | 2017 | 13292 | 9208  | 16  |
| 51742 | Norway | Europe        | 2017 | 11516 | 5793  | 516 |
| 51744 | Norway | Europe        | 2017 | 8143  | 5624  | 62  |
| 51754 | Norway | Europe        | 2017 | 11986 | 13487 | 17  |
| 51763 | Norway | Europe        | 2017 | 8780  | 5446  | 21  |
| 51766 | Norway | Europe        | 2017 | 8784  | 5447  | 416 |
| 51770 | Norway | Europe        | 2017 | 13309 | 3110  | 281 |
| 51773 | Norway | Europe        | 2017 | 1929  | 18976 | 543 |
| 51801 | Norway | Europe        | 2017 | 11431 | 18710 | 544 |
| 51802 | Norway | Europe        | 2017 | 11365 | 18979 | 21  |
| 51813 | Norway | Europe        | 2017 | 12463 | 16450 | 249 |
| 51819 | Norway | Europe        | 2017 | 8776  | 18983 | 21  |
| 51824 | Norway | Europe        | 2017 | 6716  | 17436 | 3   |
| 51897 | Norway | Europe        | 2017 | 13334 | 14299 | 17  |
| 52154 | Norway | Europe        | 2017 | 7360  | 14292 | 346 |
| 52156 | Norway | Europe        | 2017 | 11189 | 18970 | 280 |
| 52162 | Norway | Europe        | 2017 | 11191 | 18690 | 96  |
| 53452 | Norway | Europe        | 2017 | 13347 | 14764 | 243 |
| 53458 | Norway | Europe        | 2017 | 14339 | 12302 | 16  |
| 53465 | Norway | Europe        | 2017 | 10214 | 18993 | 133 |
| 53466 | Norway | Europe        | 2017 | 1599  | 645   | 243 |
| 53561 | Norway | Europe        | 2017 | 11431 | 18999 | 545 |
| 53563 | Norway | Europe        | 2017 | 8130  | 19000 | 546 |
| 53579 | Norway | Europe        | 2017 | 1893  | 14386 | 498 |
| 53586 | Norway | Europe        | 2017 | 13143 | 2318  | 219 |
| 53614 | Norway | Europe        | 2017 | 11249 | 19006 | 236 |
| 53625 | Norway | Europe        | 2017 | 14342 | 18288 | 21  |
| 53626 | Norway | Europe        | 2017 | 11968 | 5624  | 62  |
| 53645 | Norway | Europe        | 2017 | 8123  | 19010 | 62  |
| 53658 | Norway | Europe        | 2017 | 1582  | 5624  | 62  |
| 54284 | Brazil | South America | 2008 | 1901  | 225   | 18  |
| 54298 | Brazil | South America | 2010 | 12505 | 5521  | 41  |
| 54306 | Brazil | South America | 2010 | 1596  |       | 450 |

|       |                 |               |      |       |       |     |
|-------|-----------------|---------------|------|-------|-------|-----|
| 54312 | Brazil          | South America | 2011 | 1579  | 19495 | 95  |
| 54314 | Brazil          | South America | 2011 | 12905 | 10528 | 516 |
| 54337 | Brazil          | South America | 2013 | 8133  | 19502 | 21  |
| 54340 | Brazil          | South America | 2013 | 13845 | 340   | 18  |
| 54342 | Brazil          | South America | 2013 | 1921  | 338   | 21  |
| 54347 | Brazil          | South America | 2013 | 8134  | 2992  | 16  |
| 54362 | Brazil          | South America | 2014 | 8145  | 19161 | 41  |
| 54366 | Brazil          | South America | 2014 | 13550 | 19506 | 16  |
| 54372 | Brazil          | South America | 2014 | 11602 | 12551 | 3   |
| 56128 | Norway          | Europe        | 2017 | 14343 | 19018 | 278 |
| 56177 | Norway          | Europe        | 2017 | 14345 | 19025 | 546 |
| 56181 | Norway          | Europe        | 2017 | 14346 | 9184  | 196 |
| 56184 | Norway          | Europe        | 2017 | 14347 | 19028 | 239 |
| 56188 | Norway          | Europe        | 2017 | 14348 | 384   | 450 |
| 56194 | Norway          | Europe        | 2017 | 11864 | 5049  | 16  |
| 56195 | Norway          | Europe        | 2017 | 1583  | 14769 | 133 |
| 56198 | Norway          | Europe        | 2017 | 14349 | 19031 | 62  |
| 56205 | Norway          | Europe        | 2017 | 13409 | 14769 | 133 |
| 56210 | Norway          | Europe        | 2017 | 1587  | 13969 | 239 |
| 56218 | Norway          | Europe        | 2017 | 14350 | 11744 | 41  |
| 56221 | Norway          | Europe        | 2017 | 1894  | 19035 | 516 |
| 56247 | Norway          | Europe        | 2017 | 1918  | 8845  | 509 |
| 56259 | Norway          | Europe        | 2017 | 14352 | 5624  | 62  |
| 56280 | Norway          | Europe        | 2017 | 14354 | 17194 | 16  |
| 56291 | Norway          | Europe        | 2017 | 14340 | 13489 | 17  |
| 56293 | Norway          | Europe        | 2017 | 13928 | 12547 | 3   |
| 56295 | Norway          | Europe        | 2017 | 11208 | 19045 | 62  |
| 56778 | Spain           | Europe        | 2016 | 7363  | 13070 | 8   |
| 61062 | Norway          | Europe        | 2017 | 1597  | 14838 | 548 |
| 61063 | Norway          | Europe        | 2017 | 7827  | 10386 | 219 |
| 61341 | Turkey          | Asia          | 1999 | 8112  | 2599  | 289 |
| 61382 | Ivory Coast     | Africa        | 2012 | 8112  | 9902  | 162 |
| 62968 | Canada          | North America | 1991 | 10934 | 3303  | 441 |
| 75910 | The Netherlands | Europe        | 2014 | 11990 | 14376 | 414 |
| 75911 | The Netherlands | Europe        | 2014 | 8156  | 7268  | 17  |
| 75912 | The Netherlands | Europe        | 2014 | 1901  | 19624 | 3   |
| 75913 | The Netherlands | Europe        | 2014 | 7363  | 2400  | 196 |
| 75914 | The Netherlands | Europe        | 2014 | 11864 | 15192 | 16  |
| 75915 | The Netherlands | Europe        | 2014 | 11990 | 14376 | 414 |
| 75916 | The Netherlands | Europe        | 2014 | 1901  | 1407  | 3   |
| 75917 | The Netherlands | Europe        | 2014 | 11864 | 15192 | 16  |
| 75918 | The Netherlands | Europe        | 2014 | 9362  | 2992  | 16  |

|       |                 |        |      |       |       |     |
|-------|-----------------|--------|------|-------|-------|-----|
| 75919 | The Netherlands | Europe | 2014 | 1600  | 14360 | 151 |
| 75920 | The Netherlands | Europe | 2014 | 9363  | 2992  | 16  |
| 75921 | The Netherlands | Europe | 2014 | 1600  | 14360 | 151 |
| 75922 | The Netherlands | Europe | 2014 | 8143  | 19625 | 62  |
| 75923 | The Netherlands | Europe | 2014 | 6726  | 15726 |     |
| 75924 | The Netherlands | Europe | 2014 | 11990 | 51    | 414 |
| 75925 | The Netherlands | Europe | 2014 | 7827  | 2318  | 219 |
| 75926 | The Netherlands | Europe | 2014 | 11864 | 6155  | 16  |
| 75927 | The Netherlands | Europe | 2014 | 9363  | 2992  | 16  |
| 75928 | The Netherlands | Europe | 2014 | 1600  | 14360 | 151 |
| 75929 | The Netherlands | Europe | 2014 | 8163  | 2     | 439 |
| 75930 | The Netherlands | Europe | 2014 | 8143  | 5624  | 62  |
| 75931 | The Netherlands | Europe | 2014 | 1584  | 5     | 41  |
| 75932 | The Netherlands | Europe | 2014 | 1901  | 1407  | 3   |
| 75933 | The Netherlands | Europe | 2014 | 7363  | 2400  | 196 |
| 75934 | The Netherlands | Europe | 2014 | 9362  | 2992  | 16  |
| 75935 | The Netherlands | Europe | 2014 | 11428 | 2992  | 16  |
| 75936 | The Netherlands | Europe | 2014 | 8112  | 5560  | 162 |
| 75937 | The Netherlands | Europe | 2014 | 7363  | 7072  | 8   |
| 75938 | The Netherlands | Europe | 2014 | 11516 | 5793  | 516 |
| 75939 | The Netherlands | Europe | 2014 | 1901  | 3935  | 3   |
| 75940 | The Netherlands | Europe | 2014 | 11990 | 14376 | 414 |
| 75941 | The Netherlands | Europe | 2014 | 1584  | 8919  | 41  |
| 75942 | The Netherlands | Europe | 2014 | 1901  | 1407  | 3   |
| 75943 | The Netherlands | Europe | 2014 | 1901  | 1407  | 3   |
| 75944 | The Netherlands | Europe | 2014 | 1901  | 1407  | 3   |
| 75945 | The Netherlands | Europe | 2014 | 1588  | 9276  | 21  |
| 75946 | The Netherlands | Europe | 2014 | 9363  | 2992  | 16  |
| 75947 | The Netherlands | Europe | 2014 | 11428 | 2992  | 16  |
| 75948 | The Netherlands | Europe | 2014 | 1901  | 1407  | 3   |
| 75949 | The Netherlands | Europe | 2014 | 7363  | 9514  | 196 |
| 75950 | The Netherlands | Europe | 2014 | 7827  | 2318  | 219 |
| 75951 | The Netherlands | Europe | 2014 | 1901  | 1407  | 3   |
| 75952 | The Netherlands | Europe | 2014 | 9362  | 2992  | 16  |
| 75953 | The Netherlands | Europe | 2014 | 7822  | 4995  | 133 |
| 75954 | The Netherlands | Europe | 2014 | 11428 | 2992  | 16  |
| 75955 | The Netherlands | Europe | 2014 | 11990 | 14376 | 414 |
| 75956 | The Netherlands | Europe | 2014 | 8143  | 5624  | 62  |
| 75957 | The Netherlands | Europe | 2014 | 6720  | 19626 | 359 |
| 75958 | The Netherlands | Europe | 2014 | 12000 | 10174 | 196 |
| 75959 | The Netherlands | Europe | 2015 | 1579  | 6711  | 24  |
| 75960 | The Netherlands | Europe | 2015 | 1893  | 5444  | 31  |

|       |                 |        |      |       |       |     |
|-------|-----------------|--------|------|-------|-------|-----|
| 75961 | The Netherlands | Europe | 2015 | 7822  | 14373 | 133 |
| 75962 | The Netherlands | Europe | 2015 | 1901  | 6719  | 3   |
| 75963 | The Netherlands | Europe | 2015 | 1584  | 8919  | 41  |
| 75964 | The Netherlands | Europe | 2015 | 1599  | 11461 | 243 |
| 75965 | The Netherlands | Europe | 2015 | 8143  | 11421 | 62  |
| 75966 | The Netherlands | Europe | 2015 | 7363  | 2400  | 196 |
| 75967 | The Netherlands | Europe | 2015 | 1584  | 4326  | 41  |
| 75968 | The Netherlands | Europe | 2015 | 11428 | 2992  | 16  |
| 75969 | The Netherlands | Europe | 2015 | 7363  | 2400  | 196 |
| 75970 | The Netherlands | Europe | 2015 | 7827  | 2318  | 219 |
| 75971 | The Netherlands | Europe | 2015 | 7827  | 2318  | 219 |
| 75972 | The Netherlands | Europe | 2015 | 8156  | 5441  | 17  |
| 75973 | The Netherlands | Europe | 2015 | 7363  | 2400  | 196 |
| 75974 | The Netherlands | Europe | 2015 | 7827  | 2318  | 219 |
| 75975 | The Netherlands | Europe | 2015 | 7827  | 2318  | 219 |
| 75976 | The Netherlands | Europe | 2015 | 11516 | 5793  | 516 |
| 75977 | The Netherlands | Europe | 2015 | 15571 | 8426  | 62  |
| 75978 | The Netherlands | Europe | 2015 | 7823  | 11210 | 133 |
| 75979 | The Netherlands | Europe | 2015 | 11463 | 2992  | 16  |
| 75980 | The Netherlands | Europe | 2015 | 7827  | 2318  | 219 |
| 75981 | The Netherlands | Europe | 2015 | 1599  | 18208 | 243 |
| 75982 | The Netherlands | Europe | 2015 | 7363  | 6360  | 196 |
| 75983 | The Netherlands | Europe | 2015 | 8156  | 13155 | 17  |
| 75984 | The Netherlands | Europe | 2015 | 11428 | 2992  | 16  |
| 75985 | The Netherlands | Europe | 2015 | 7822  | 5400  | 133 |
| 75986 | The Netherlands | Europe | 2015 | 1901  | 1407  | 3   |
| 75987 | The Netherlands | Europe | 2015 | 11428 | 2992  | 16  |
| 75988 | The Netherlands | Europe | 2015 | 11251 | 11677 | 549 |
| 75989 | The Netherlands | Europe | 2015 | 1599  | 11461 | 243 |
| 75990 | The Netherlands | Europe | 2015 | 11990 | 14376 | 414 |
| 75991 | The Netherlands | Europe | 2015 | 1596  | 384   | 450 |
| 75992 | The Netherlands | Europe | 2015 | 7363  | 17409 | 8   |
| 75993 | The Netherlands | Europe | 2015 | 7827  | 2318  | 219 |
| 75994 | The Netherlands | Europe | 2016 | 13143 | 292   | 219 |
| 75995 | The Netherlands | Europe | 2016 | 11428 | 2992  | 16  |
| 75996 | The Netherlands | Europe | 2016 | 11428 | 3391  | 16  |
| 75997 | The Netherlands | Europe | 2016 | 7363  | 10257 | 196 |
| 75998 | The Netherlands | Europe | 2016 | 1579  | 19627 | 24  |
| 75999 | The Netherlands | Europe | 2016 | 8156  | 16283 | 17  |
| 76000 | The Netherlands | Europe | 2016 | 9363  | 19628 | 16  |
| 76001 | The Netherlands | Europe | 2016 | 8156  | 5441  | 17  |
| 76002 | The Netherlands | Europe | 2016 | 7363  | 13878 | 8   |

|       |                 |        |      |       |       |     |
|-------|-----------------|--------|------|-------|-------|-----|
| 76003 | The Netherlands | Europe | 2016 | 8143  | 5624  | 62  |
| 76004 | The Netherlands | Europe | 2016 | 8163  | 2     | 439 |
| 76005 | The Netherlands | Europe | 2016 | 1599  | 11461 | 243 |
| 76006 | The Netherlands | Europe | 2016 | 9363  | 9925  | 16  |
| 76007 | The Netherlands | Europe | 2016 | 1599  | 11461 | 243 |
| 76008 | The Netherlands | Europe | 2016 | 7363  | 10789 | 196 |
| 76009 | The Netherlands | Europe | 2016 | 8156  | 5441  | 17  |
| 76010 | The Netherlands | Europe | 2016 | 7363  | 2400  | 196 |
| 76011 | The Netherlands | Europe | 2016 | 8156  | 5441  | 17  |
| 76012 | The Netherlands | Europe | 2016 | 1893  | 19629 | 31  |
| 76013 | The Netherlands | Europe | 2016 | 1599  | 11461 | 243 |
| 76014 | The Netherlands | Europe | 2016 | 7827  | 2318  | 219 |
| 76015 | The Netherlands | Europe | 2016 | 9363  | 8241  | 16  |
| 76016 | The Netherlands | Europe | 2016 | 1599  | 11461 | 243 |
| 76017 | The Netherlands | Europe | 2016 | 8156  | 5441  | 17  |
| 76018 | The Netherlands | Europe | 2016 | 11516 | 19630 | 516 |
| 76019 | The Netherlands | Europe | 2016 | 9363  | 16493 | 16  |
| 76020 | The Netherlands | Europe | 2016 | 1901  | 2958  | 3   |
| 76021 | The Netherlands | Europe | 2016 | 1901  | 2958  | 3   |
| 76022 | The Netherlands | Europe | 2016 | 1901  | 2958  | 3   |
| 76023 | The Netherlands | Europe | 2016 | 13292 | 9208  | 16  |
| 76024 | The Netherlands | Europe | 2016 | 1901  | 2958  | 3   |
| 76025 | The Netherlands | Europe | 2016 | 11431 | 19631 | 545 |
| 76026 | The Netherlands | Europe | 2016 | 8156  | 5441  | 17  |
| 76027 | The Netherlands | Europe | 2016 | 7363  | 15239 | 196 |
| 76028 | The Netherlands | Europe | 2016 | 11864 | 9219  | 16  |
| 76029 | The Netherlands | Europe | 2016 | 8163  | 2     | 439 |
| 76030 | The Netherlands | Europe | 2016 | 11864 | 9219  | 16  |
| 76031 | The Netherlands | Europe | 2016 | 7827  | 2318  | 219 |
| 76032 | The Netherlands | Europe | 2016 | 8156  | 5441  | 17  |
| 76033 | The Netherlands | Europe | 2016 | 7827  | 2318  | 219 |
| 76034 | The Netherlands | Europe | 2016 | 7827  | 2318  | 219 |
| 76035 | The Netherlands | Europe | 2016 | 7827  | 2318  | 219 |
| 76036 | The Netherlands | Europe | 2017 | 1599  | 11461 | 243 |
| 76037 | The Netherlands | Europe | 2017 | 11864 | 15906 | 16  |
| 76038 | The Netherlands | Europe | 2017 | 15572 | 273   | 360 |
| 76039 | The Netherlands | Europe | 2017 | 7827  | 2318  | 219 |
| 76040 | The Netherlands | Europe | 2017 | 11428 | 298   | 16  |
| 76041 | The Netherlands | Europe | 2017 | 7827  | 2318  | 219 |
| 76042 | The Netherlands | Europe | 2017 | 11971 | 15058 | 62  |
| 76043 | The Netherlands | Europe | 2017 | 8156  | 19632 | 17  |
| 76044 | The Netherlands | Europe | 2017 | 11428 | 5582  | 16  |

|       |                 |        |      |       |       |     |
|-------|-----------------|--------|------|-------|-------|-----|
| 76045 | The Netherlands | Europe | 2017 | 8135  | 387   | 425 |
| 76046 | The Netherlands | Europe | 2017 | 1599  | 11461 | 243 |
| 76047 | The Netherlands | Europe | 2017 | 8156  | 13062 | 17  |
| 76048 | The Netherlands | Europe | 2017 | 7827  | 2318  | 219 |
| 76049 | The Netherlands | Europe | 2017 | 11428 | 5049  | 16  |
| 76050 | The Netherlands | Europe | 2017 | 1901  | 12618 | 3   |
| 76051 | The Netherlands | Europe | 2017 | 9363  | 19633 | 16  |
| 76052 | The Netherlands | Europe | 2017 | 7827  | 10386 | 219 |
| 76053 | The Netherlands | Europe | 2017 | 8156  | 5441  | 17  |
| 76054 | The Netherlands | Europe | 2017 | 7827  | 2318  | 219 |
| 76055 | The Netherlands | Europe | 2017 | 7827  | 10386 | 219 |
| 76056 | The Netherlands | Europe | 2017 | 8135  | 5743  | 425 |
| 76057 | The Netherlands | Europe | 2017 | 1596  | 16972 | 450 |
| 76058 | The Netherlands | Europe | 2017 | 9363  | 12302 | 16  |
| 76059 | The Netherlands | Europe | 2017 | 1588  | 19634 | 21  |
| 76060 | The Netherlands | Europe | 2017 | 8135  | 387   | 425 |
| 76061 | The Netherlands | Europe | 2017 | 7359  | 19635 | 223 |
| 76062 | The Netherlands | Europe | 2017 | 13292 | 9208  | 16  |
| 76063 | The Netherlands | Europe | 2017 | 7359  | 10121 | 223 |
| 76064 | The Netherlands | Europe | 2017 | 8156  | 5441  | 17  |
| 76065 | The Netherlands | Europe | 2017 | 10314 | 16856 | 3   |
| 76066 | The Netherlands | Europe | 2017 | 9363  | 12302 | 16  |
| 76067 | The Netherlands | Europe | 2018 | 7822  | 4995  | 133 |
| 76068 | The Netherlands | Europe | 2018 | 10314 | 16020 | 3   |
| 76069 | The Netherlands | Europe | 2018 | 1587  | 13971 | 239 |
| 76070 | The Netherlands | Europe | 2018 | 8156  | 5441  | 17  |
| 76071 | The Netherlands | Europe | 2018 | 8156  | 5441  | 17  |
| 76072 | The Netherlands | Europe | 2018 | 1585  | 186   | 44  |
| 76073 | The Netherlands | Europe | 2018 | 7822  | 4995  | 133 |
| 76074 | The Netherlands | Europe | 2018 | 7827  | 15710 | 219 |
| 76075 | The Netherlands | Europe | 2018 | 10314 | 16020 | 3   |
| 76076 | The Netherlands | Europe | 2018 | 13734 | 13489 | 17  |
| 76077 | The Netherlands | Europe | 2018 | 8163  | 8110  | 439 |
| 76078 | The Netherlands | Europe | 2018 | 11864 | 18234 | 16  |
| 76079 | The Netherlands | Europe | 2018 | 11971 | 15058 | 62  |
| 76080 | The Netherlands | Europe | 2018 | 8156  | 5441  | 17  |
| 76081 | The Netherlands | Europe | 2018 | 11864 | 18234 | 16  |
| 76082 | The Netherlands | Europe | 2018 | 7822  | 14994 | 3   |
| 76083 | The Netherlands | Europe | 2018 | 11971 | 15058 | 62  |
| 76084 | The Netherlands | Europe | 2018 | 1583  | 15589 |     |
| 76085 | The Netherlands | Europe | 2018 | 10314 | 19178 | 3   |
| 76086 | The Netherlands | Europe | 2018 | 7827  | 8845  | 219 |

|       |                 |        |      |       |       |     |
|-------|-----------------|--------|------|-------|-------|-----|
| 76087 | The Netherlands | Europe | 2018 | 8156  | 5441  | 17  |
| 76088 | The Netherlands | Europe | 2018 | 11990 | 51    | 414 |
| 76089 | The Netherlands | Europe | 2018 | 8156  | 5441  | 17  |
| 76090 | The Netherlands | Europe | 2018 | 11864 | 18231 | 16  |
| 76091 | The Netherlands | Europe | 2018 | 1583  | 15589 | 133 |
| 76092 | The Netherlands | Europe | 2018 | 11864 | 5049  | 16  |
| 76093 | The Netherlands | Europe | 2018 | 8156  | 5441  | 17  |
| 76094 | The Netherlands | Europe | 2018 | 1583  | 15589 | 133 |
| 76095 | The Netherlands | Europe | 2018 | 1583  | 14769 | 133 |
| 76096 | The Netherlands | Europe | 2018 | 8122  | 292   | 446 |
| 76097 | The Netherlands | Europe | 2018 | 1599  | 18147 | 243 |
| 76098 | The Netherlands | Europe | 2018 | 1583  | 15589 | 133 |
| 76099 | The Netherlands | Europe | 2018 | 8156  | 5441  | 17  |
| 76100 | The Netherlands | Europe | 2018 | 10314 | 19178 | 3   |
| 76101 | The Netherlands | Europe | 2018 | 1583  | 15589 | 133 |
| 76102 | The Netherlands | Europe | 2018 | 8156  | 5441  | 17  |
| 76103 | The Netherlands | Europe | 2018 | 8156  | 799   | 17  |
| 76104 | The Netherlands | Europe | 2018 | 9363  | 17495 | 16  |
| 76105 | The Netherlands | Europe | 2018 | 1587  | 18131 | 239 |
| 76106 | The Netherlands | Europe | 2018 | 9363  | 12302 | 16  |
| 76107 | The Netherlands | Europe | 2018 | 1583  | 15589 | 133 |
| 76108 | The Netherlands | Europe | 2018 | 7822  | 4654  | 3   |
| 76109 | The Netherlands | Europe | 2018 | 15573 | 17371 | 16  |
| 76110 | The Netherlands | Europe | 2018 | 8156  | 19636 | 17  |
| 76111 | The Netherlands | Europe | 2018 | 10314 | 19188 | 3   |
| 76112 | The Netherlands | Europe | 2018 | 7827  | 14051 | 219 |
| 76113 | The Netherlands | Europe | 2018 | 7827  | 10386 | 219 |
| 76114 | The Netherlands | Europe | 2018 | 8156  | 5441  | 17  |
| 76115 | The Netherlands | Europe | 2018 | 7827  | 10386 | 219 |
| 76116 | The Netherlands | Europe | 2018 | 7827  | 10386 | 219 |
| 76117 | The Netherlands | Europe | 2018 | 1583  | 15589 | 133 |
| 76118 | The Netherlands | Europe | 2018 | 9363  | 3935  | 16  |
| 76119 | The Netherlands | Europe | 2018 | 13292 | 9208  | 16  |
| 76120 | The Netherlands | Europe | 2018 | 7827  | 10386 | 219 |
| 76121 | The Netherlands | Europe | 2018 | 1583  | 15589 | 133 |
| 76122 | The Netherlands | Europe | 2018 | 9363  | 18831 | 16  |
| 76123 | The Netherlands | Europe | 2018 | 7827  | 2318  | 219 |
| 76124 | The Netherlands | Europe | 2018 | 1583  | 15589 | 133 |
| 76125 | The Netherlands | Europe | 2018 | 8156  | 5441  | 17  |
| 76126 | The Netherlands | Europe | 2018 | 8156  | 18362 | 17  |
| 76127 | The Netherlands | Europe | 2018 | 7363  | 8115  | 196 |
| 76128 | The Netherlands | Europe | 2018 | 11208 | 19637 |     |

|       |                 |        |      |       |       |     |
|-------|-----------------|--------|------|-------|-------|-----|
| 76129 | The Netherlands | Europe | 2018 | 1599  | 11461 | 243 |
| 76130 | The Netherlands | Europe | 2018 | 8135  | 5743  | 425 |
| 76131 | The Netherlands | Europe | 2018 | 8163  | 19638 | 439 |
| 76132 | The Netherlands | Europe | 2018 | 1599  | 13484 | 243 |
| 76133 | The Netherlands | Europe | 2019 | 7822  | 19552 | 3   |
| 76134 | The Netherlands | Europe | 2019 | 8143  | 5624  | 62  |
| 76135 | The Netherlands | Europe | 2019 | 1599  | 18147 | 243 |
| 76136 | The Netherlands | Europe | 2019 | 7822  | 19559 | 3   |
| 76137 | The Netherlands | Europe | 2019 | 11428 | 4246  | 16  |
| 76138 | The Netherlands | Europe | 2019 | 11706 | 17972 | 3   |
| 76139 | The Netherlands | Europe | 2019 | 1599  | 19639 | 243 |
| 76140 | The Netherlands | Europe | 2019 | 7363  | 9510  | 196 |
| 76141 | The Netherlands | Europe | 2019 | 15574 | 19640 | 361 |
| 76142 | The Netherlands | Europe | 2019 | 1599  | 19555 | 243 |
| 76143 | The Netherlands | Europe | 2019 | 13292 | 19641 | 16  |
| 76144 | The Netherlands | Europe | 2019 | 1588  | 19642 | 21  |
| 76145 | The Netherlands | Europe | 2019 | 1580  | 2493  | 16  |
| 76146 | The Netherlands | Europe | 2019 | 15575 | 5     | 18  |
| 76147 | The Netherlands | Europe | 2019 | 13292 | 9208  | 16  |
| 76148 | The Netherlands | Europe | 2019 | 7822  | 14994 | 3   |
| 76149 | The Netherlands | Europe | 2019 | 1583  | 15589 | 133 |
| 76150 | The Netherlands | Europe | 2019 | 1588  | 15956 | 21  |
| 76151 | The Netherlands | Europe | 2019 | 10314 | 19188 | 3   |
| 76152 | The Netherlands | Europe | 2019 | 7822  | 14994 | 3   |
| 76153 | The Netherlands | Europe | 2019 | 12973 | 19643 | 62  |
| 76154 | The Netherlands | Europe | 2019 | 9363  | 18146 | 16  |
| 76155 | The Netherlands | Europe | 2019 | 8163  | 8110  | 439 |
| 76156 | The Netherlands | Europe | 2019 | 9363  | 17495 | 16  |
| 76157 | The Netherlands | Europe | 2019 | 9903  | 18354 | 41  |
| 76158 | The Netherlands | Europe | 2019 | 11990 | 51    | 414 |
| 76159 | The Netherlands | Europe | 2019 | 7827  | 18666 | 219 |
| 76160 | The Netherlands | Europe | 2019 | 8156  | 5441  | 17  |
| 76161 | The Netherlands | Europe | 2019 | 7367  | 19644 | 16  |
| 76162 | The Netherlands | Europe | 2019 | 7827  | 16441 | 219 |
| 76163 | The Netherlands | Europe | 2019 | 7827  | 8845  | 219 |
| 76164 | The Netherlands | Europe | 2019 | 1599  | 11461 | 243 |
| 76165 | The Netherlands | Europe | 2019 | 1599  | 11461 | 243 |
| 76166 | The Netherlands | Europe | 2019 | 8143  | 19645 | 62  |
| 76167 | The Netherlands | Europe | 2019 | 8163  | 2     | 439 |
| 76168 | The Netherlands | Europe | 2019 | 7822  | 14994 | 3   |
| 76169 | The Netherlands | Europe | 2019 | 10314 | 19646 | 3   |
| 76170 | The Netherlands | Europe | 2019 | 10314 | 19188 | 3   |



|       |                 |        |      |       |       |     |
|-------|-----------------|--------|------|-------|-------|-----|
| 76171 | The Netherlands | Europe | 2019 | 14253 | 16065 | 3   |
| 76172 | The Netherlands | Europe | 2019 | 7359  | 18526 | 223 |
| 76173 | The Netherlands | Europe | 2019 | 11864 | 18234 | 16  |
| 76174 | The Netherlands | Europe | 2019 | 1583  | 15589 | 133 |
| 76175 | The Netherlands | Europe | 2019 | 8143  | 19647 | 62  |
| 76176 | The Netherlands | Europe | 2019 | 7827  | 10386 | 219 |
| 76177 | The Netherlands | Europe | 2019 | 13334 | 12004 | 17  |
| 76178 | The Netherlands | Europe | 2019 | 13956 | 13893 | 17  |
| 76179 | The Netherlands | Europe | 2019 | 1583  | 15589 | 133 |
| 76180 | The Netherlands | Europe | 2019 | 11990 | 51    | 414 |
| 76181 | The Netherlands | Europe | 2019 | 9363  | 12302 | 16  |
| 76182 | The Netherlands | Europe | 2019 | 7827  | 19233 | 219 |
| 76183 | The Netherlands | Europe | 2019 | 11706 | 17972 | 3   |
| 76184 | The Netherlands | Europe | 2019 | 11422 | 19648 | 16  |
| 76185 | The Netherlands | Europe | 2019 | 7827  | 19649 | 219 |
| 76186 | The Netherlands | Europe | 2019 | 1588  | 13234 | 21  |
| 76187 | The Netherlands | Europe | 2019 | 8135  | 387   | 425 |
| 76188 | The Netherlands | Europe | 2019 | 7367  | 19644 | 16  |
| 76189 | The Netherlands | Europe | 2019 | 15331 | 19650 | 3   |
| 76193 | The Netherlands | Europe | 2017 | 7827  | 10386 | 219 |
| 76194 | The Netherlands | Europe | 2017 | 7827  | 10386 | 219 |
| 76195 | The Netherlands | Europe | 2017 | 7827  | 14051 | 219 |
| 76196 | The Netherlands | Europe | 2018 | 1901  | 1407  | 3   |
| 76197 | The Netherlands | Europe | 2018 | 1901  | 1407  | 3   |
| 76198 | The Netherlands | Europe | 2018 | 1901  | 1407  | 3   |
| 76199 | The Netherlands | Europe | 2018 | 7827  | 10386 | 219 |
| 76200 | The Netherlands | Europe | 2018 | 7827  | 2318  | 219 |
| 76201 | The Netherlands | Europe | 2018 | 7827  | 2318  | 219 |
| 76202 | The Netherlands | Europe | 2018 | 7827  | 2318  | 219 |
| 76203 | The Netherlands | Europe | 2018 | 7827  | 19651 | 219 |
| 76204 | The Netherlands | Europe | 2018 | 7827  | 14051 | 219 |
| 76205 | The Netherlands | Europe | 2018 | 7827  | 14051 | 219 |
| 76206 | The Netherlands | Europe | 2018 | 7827  | 10386 | 219 |
| 76207 | The Netherlands | Europe | 2018 | 7827  | 10386 | 219 |
| 76208 | The Netherlands | Europe | 2018 | 7827  | 10386 | 219 |
| 76209 | The Netherlands | Europe | 2018 | 7827  | 16441 | 219 |
| 76210 | The Netherlands | Europe | 2018 | 7827  | 10386 | 219 |
| 76211 | The Netherlands | Europe | 2018 | 7827  | 18113 | 219 |
| 76212 | The Netherlands | Europe | 2019 | 7827  | 19652 | 219 |
| 76213 | The Netherlands | Europe | 2019 | 7827  | 19652 | 219 |
| 76214 | The Netherlands | Europe | 2019 | 7827  | 16441 | 219 |
| 76215 | The Netherlands | Europe | 2019 | 7827  | 10386 | 219 |

|       |                 |        |      |       |       |     |
|-------|-----------------|--------|------|-------|-------|-----|
| 76216 | The Netherlands | Europe | 2019 | 7827  | 16441 | 219 |
| 76217 | The Netherlands | Europe | 2019 | 7827  | 10386 | 219 |
| 76218 | The Netherlands | Europe | 2019 | 7827  | 16441 | 219 |
| 76219 | The Netherlands | Europe | 2019 | 7827  | 10386 | 219 |
| 76220 | The Netherlands | Europe | 2019 | 7827  | 10386 | 219 |
| 76221 | The Netherlands | Europe | 2019 | 7827  | 10386 | 219 |
| 76222 | The Netherlands | Europe | 2019 | 7827  | 10386 | 219 |
| 76223 | The Netherlands | Europe | 2019 | 7827  | 10386 | 219 |
| 76224 | The Netherlands | Europe | 2019 | 7827  | 16441 | 219 |
| 76225 | The Netherlands | Europe | 2019 | 7827  | 10386 | 219 |
| 76226 | The Netherlands | Europe | 2019 | 14369 | 14051 | 219 |
| 76227 | The Netherlands | Europe | 2019 | 14369 | 14051 | 219 |
| 76228 | The Netherlands | Europe | 2009 | 1901  | 1407  | 3   |
| 76229 | The Netherlands | Europe | 2010 | 1901  | 1407  | 3   |
| 76230 | The Netherlands | Europe | 2010 | 8114  | 4     | 44  |
| 76231 | The Netherlands | Europe | 2010 | 1901  | 1407  | 3   |
| 76232 | The Netherlands | Europe | 2010 | 1901  | 1407  | 3   |
| 76233 | The Netherlands | Europe | 2010 | 1901  | 1407  | 3   |
| 76234 | The Netherlands | Europe | 2010 | 1901  | 1407  | 3   |
| 76235 | The Netherlands | Europe | 2010 | 1901  | 1407  | 3   |
| 76236 | The Netherlands | Europe | 2010 | 1901  | 1407  | 3   |
| 76237 | The Netherlands | Europe | 2010 | 1901  | 1407  | 3   |
| 76238 | The Netherlands | Europe | 2011 | 1579  | 21    | 24  |
| 76239 | The Netherlands | Europe | 2012 | 7363  | 2400  | 196 |
| 76240 | The Netherlands | Europe | 2012 | 1901  | 1407  | 3   |
| 76241 | The Netherlands | Europe | 2012 | 7363  | 2400  | 196 |
| 76242 | The Netherlands | Europe | 2012 | 1901  | 13846 | 3   |
| 76243 | The Netherlands | Europe | 2012 | 1901  | 1407  | 3   |
| 76244 | The Netherlands | Europe | 2012 | 1901  | 3128  | 3   |
| 76245 | The Netherlands | Europe | 2012 | 7363  | 2400  | 196 |
| 76246 | The Netherlands | Europe | 2012 | 1901  | 1407  | 3   |
| 76247 | The Netherlands | Europe | 2013 | 1901  | 13846 | 3   |
| 76248 | The Netherlands | Europe | 2013 | 1901  | 1407  | 3   |
| 76249 | The Netherlands | Europe | 2013 | 1579  | 1034  | 24  |
| 76250 | The Netherlands | Europe | 2013 | 7363  | 2400  | 196 |
| 76251 | The Netherlands | Europe | 2013 | 7363  | 2400  | 196 |
| 76252 | The Netherlands | Europe | 2013 | 1579  | 21    | 24  |
| 76253 | The Netherlands | Europe | 2013 | 1579  | 21    | 24  |
| 76254 | The Netherlands | Europe | 2013 | 7363  | 2400  | 196 |
| 76255 | The Netherlands | Europe | 2013 | 7363  | 8435  | 196 |
| 76256 | The Netherlands | Europe | 2013 | 1901  | 1407  | 3   |
| 76257 | The Netherlands | Europe | 2013 | 7363  | 3811  | 196 |

|       |                 |        |      |       |       |     |
|-------|-----------------|--------|------|-------|-------|-----|
| 76258 | The Netherlands | Europe | 2013 | 7363  | 14358 | 196 |
| 76259 | The Netherlands | Europe | 2013 | 7360  | 1407  | 3   |
| 76260 | The Netherlands | Europe | 2013 | 1901  | 6827  |     |
| 76261 | The Netherlands | Europe | 2013 | 7363  | 10257 | 196 |
| 76262 | The Netherlands | Europe | 2013 | 7363  | 2400  | 196 |
| 76263 | The Netherlands | Europe | 2013 | 1901  | 3806  | 3   |
| 76264 | The Netherlands | Europe | 2013 | 7363  | 2400  | 196 |
| 76265 | The Netherlands | Europe | 2013 | 7363  | 10257 | 196 |
| 76266 | The Netherlands | Europe | 2013 | 7363  | 10257 | 196 |
| 76267 | The Netherlands | Europe | 2013 | 7363  | 10257 | 196 |
| 76268 | The Netherlands | Europe | 2014 | 1579  | 13407 | 24  |
| 76269 | The Netherlands | Europe | 2014 | 1579  | 11064 | 24  |
| 76270 | The Netherlands | Europe | 2014 | 7363  | 2400  | 196 |
| 76271 | The Netherlands | Europe | 2014 | 7363  | 2400  | 196 |
| 76272 | The Netherlands | Europe | 2014 | 7363  | 2400  | 196 |
| 76273 | The Netherlands | Europe | 2014 | 7363  | 6360  | 196 |
| 76274 | The Netherlands | Europe | 2014 | 7363  | 2400  | 196 |
| 76275 | The Netherlands | Europe | 2014 | 7363  | 6360  | 196 |
| 76276 | The Netherlands | Europe | 2014 | 1579  | 21    | 24  |
| 76277 | The Netherlands | Europe | 2014 | 7363  | 10257 | 196 |
| 76278 | The Netherlands | Europe | 2014 | 1579  | 21    | 24  |
| 76279 | The Netherlands | Europe | 2014 | 1901  | 1407  | 3   |
| 76280 | The Netherlands | Europe | 2015 | 7367  | 1407  | 3   |
| 76281 | The Netherlands | Europe | 2015 | 7363  | 11800 | 196 |
| 76282 | The Netherlands | Europe | 2015 | 7363  | 19653 | 196 |
| 76283 | The Netherlands | Europe | 2015 | 1579  | 21    | 24  |
| 76284 | The Netherlands | Europe | 2015 | 1901  | 2212  | 3   |
| 76286 | The Netherlands | Europe | 2010 | 7363  | 14343 | 196 |
| 76287 | The Netherlands | Europe | 2011 | 1901  | 3128  | 3   |
| 76288 | The Netherlands | Europe | 2011 | 1901  | 5533  | 3   |
| 76289 | The Netherlands | Europe | 2013 | 1901  | 3806  | 3   |
| 76290 | The Netherlands | Europe | 2013 | 7363  | 10257 | 196 |
| 76291 | The Netherlands | Europe | 2014 |       | 1034  |     |
| 76292 | The Netherlands | Europe | 2014 | 7363  | 6360  | 196 |
| 76293 | The Netherlands | Europe | 2017 | 9363  | 12302 | 16  |
| 76323 | Norway          | Europe | 2017 | 7363  | 19040 | 239 |
| 76333 | Norway          | Europe | 2017 | 10622 | 15920 | 41  |
| 76348 | Norway          | Europe | 2017 | 13415 | 12547 | 3   |
| 76407 | Norway          | Europe | 2017 | 13484 | 5793  | 516 |
| 76455 | Norway          | Europe | 2017 | 1600  |       | 533 |
| 76473 | Norway          | Europe | 2017 | 13333 |       | 239 |
| 76497 | Norway          | Europe | 2017 | 10932 | 12302 | 16  |

|       |        |               |      |       |       |     |
|-------|--------|---------------|------|-------|-------|-----|
| 76511 | Norway | Europe        | 2017 | 8776  | 19176 | 354 |
| 78483 | Canada | North America | 1997 | 1904  | 10476 | 432 |
| 78490 | Canada | North America | 2001 | 12524 | 108   | 370 |
| 78505 | Canada | North America | 2006 | 12531 | 1056  | 133 |
| 78507 | Canada | North America | 2006 | 1590  | 4014  | 435 |
| 78510 | Canada | North America | 2006 | 8153  | 3108  | 3   |
| 78514 | Canada | North America | 2006 | 1901  | 225   | 18  |
| 78519 | Canada | North America | 2007 | 12532 | 3565  | 31  |
| 78550 | Canada | North America | 2010 | 10891 | 757   | 3   |
| 78557 | Canada | North America | 2010 | 12537 | 51    | 414 |
| 78558 | Canada | North America | 2010 | 12536 | 6351  | 44  |
| 78578 | Canada | North America | 2010 | 11427 | 3150  | 3   |
| 78592 | Canada | North America | 2011 | 9365  | 1513  | 3   |
| 78594 | Canada | North America | 2011 | 10634 | 7159  | 532 |
| 78599 | Canada | North America | 2011 | 12542 | 1407  | 3   |
| 78611 | Canada | North America | 2012 | 1600  | 8851  | 151 |
| 78632 | Canada | North America | 2012 | 10931 | 3656  | 422 |
| 78637 | Canada | North America | 1989 | 1927  | 919   | 409 |
| 79079 | USA    | North America | 2016 | 13539 | 17683 | 304 |
| 79114 | USA    | North America | 2016 | 12093 | 13528 | 418 |
| 79117 | USA    | North America | 2016 | 11422 | 4822  | 16  |
| 79124 | USA    | North America | 2016 | 1600  | 4990  | 398 |
| 79137 | USA    | North America | 2016 | 7367  | 17909 | 16  |
| 79140 | USA    | North America | 2016 | 13537 | 4270  | 3   |
| 79155 | USA    | North America | 2016 | 7371  | 3169  | 34  |
| 79174 | USA    | North America | 2016 | 7822  | 14994 | 3   |
| 79210 | USA    | North America | 2016 | 1904  | 7555  | 219 |
| 79219 | USA    | North America | 2016 | 13548 | 7974  | 196 |
| 79223 | USA    | North America | 2016 | 13413 | 15745 | 509 |
| 79224 | USA    | North America | 2016 | 12086 | 25    | 414 |
| 79233 | USA    | North America | 2016 | 11967 | 5004  | 304 |
| 79260 | USA    | North America | 2016 | 6959  | 17721 | 304 |
| 79273 | USA    | North America | 2016 | 13526 | 9918  | 62  |
| 79282 | USA    | North America | 2016 | 1601  | 6339  | 509 |
| 79283 | USA    | North America | 2016 | 13536 | 5441  | 17  |
| 79297 | USA    | North America | 2016 | 13532 | 9296  | 509 |
| 79315 | USA    | North America | 2016 | 13489 | 14700 | 219 |
| 79316 | USA    | North America | 2016 | 11181 | 17730 | 418 |
| 79318 | USA    | North America | 2016 | 12974 | 17731 | 219 |
| 79332 | USA    | North America | 2016 | 13547 | 17708 | 16  |
| 79336 | USA    | North America | 2016 | 8154  | 17712 | 44  |
| 79360 | USA    | North America | 2016 | 12462 | 6968  | 244 |

|       |             |               |      |       |       |     |
|-------|-------------|---------------|------|-------|-------|-----|
| 79369 | USA         | North America | 2016 | 11986 | 28    | 41  |
| 82283 | USA         | North America | 2004 | 7371  | 292   | 3   |
| 82290 | USA         | North America | 2011 | 10312 | 1407  | 3   |
| 83824 | Norway      | Europe        | 2018 | 13942 | 19055 | 37  |
| 83853 | Norway      | Europe        | 2018 | 14108 | 7574  | 196 |
| 86565 | New Zealand | Oceania       | 2015 | 11428 | 9368  | 16  |
| 86566 | New Zealand | Oceania       | 2015 | 13529 | 766   | 17  |
| 86634 | New Zealand | Oceania       | 2015 | 11463 | 13990 | 16  |
| 86685 | New Zealand | Oceania       | 2015 | 12040 | 7803  | 523 |
| 86840 | New Zealand | Oceania       | 2015 | 14464 | 13990 | 16  |
| 86860 | New Zealand | Oceania       | 2015 | 10932 | 7577  | 304 |
| 86914 | New Zealand | Oceania       | 2014 | 14446 |       | 133 |

**Table S2. List of accessory NEIS loci with its prevalence and functional annotation.**

| NEIS locus | Duplicate NEIS loci                | Prevalence in subset of 765 isolates | Prevalence in all 8013 isolates | (PubMLST) gene annotation                    | PubMLST functional scheme (NG schemes only) | Final annotation          | Identified by              |
|------------|------------------------------------|--------------------------------------|---------------------------------|----------------------------------------------|---------------------------------------------|---------------------------|----------------------------|
| NEIS0027   | NEIS1865                           | 3.7%                                 | 3.6%                            | hypothetical integral membrane protein       | -                                           | Nf1 phage island          | Genome Comparator + PIRATE |
| NEIS0028   | NEIS1864                           | 3.7%                                 | 3.6%                            | hypothetical integral membrane protein       | -                                           | Nf1 phage island          | Genome Comparator + PIRATE |
| NEIS0029   | NEIS1863/<br>NEIS2453/<br>NEIS2459 | 3.7%                                 | 3.6%                            | hypothetical protein                         | -                                           | Nf1 phage island          | Genome Comparator + PIRATE |
| NEIS0030   | NEIS1862/<br>NEIS2452/<br>NEIS2460 | 3.7%                                 | 3.6%                            | conserved hypothetical protein               | -                                           | Nf1 phage island          | Genome Comparator + PIRATE |
| NEIS0031   | NEIS1861/<br>NEIS0277              | 3.7%                                 | 3.6%                            | putative phage replication initiation factor | -                                           | Nf1 phage island          | Genome Comparator + PIRATE |
| NEIS0080   |                                    | 38.4%                                | 48.7%                           | hypothetical protein                         | Other loci                                  | Putative secretion system | Genome Comparator + PIRATE |
| NEIS0081   |                                    | 38.4%                                | 48.7%                           | hypothetical protein                         | Other loci                                  | Putative secretion system | Genome Comparator          |
| NEIS0083   |                                    | 37.8%                                | 48.0%                           | hypothetical protein                         | Other loci                                  | Putative secretion system | Genome Comparator + PIRATE |
| NEIS0084   |                                    | 37.9%                                | 48.4%                           | hypothetical protein                         | Other loci                                  | Putative secretion system | Genome Comparator          |
| NEIS0085   |                                    | 38.4%                                | 48.6%                           | protein export protein                       | Other loci                                  | Putative secretion system | Genome Comparator + PIRATE |
| NEIS0086   |                                    | 38.2%                                | 48.4%                           | protein export protein                       | Other loci                                  | Putative secretion system | Genome Comparator + PIRATE |
| NEIS0089   |                                    | 38.4%                                | 48.7%                           | hypothetical protein                         | Other loci                                  | Putative secretion system | Genome Comparator + PIRATE |

|          |          |       |       |                                                               |                     |                                     |                            |
|----------|----------|-------|-------|---------------------------------------------------------------|---------------------|-------------------------------------|----------------------------|
| NEIS0364 |          | 78.3% | 79.6% | hypothetical protein                                          | Other loci          | Hypothetical protein                | Genome Comparator + PIRATE |
| NEIS0365 |          | 78.3% | 79.3% | hypothetical protein                                          | Other loci          | Hypothetical protein                | Genome Comparator + PIRATE |
| NEIS0486 |          | 30.1% | 26.0% | alcohol dehydrogenase                                         | -                   | Alcohol dehydrogenase               | Genome Comparator + PIRATE |
| NEIS0524 |          | 52.3% | 74.4% | putative peptidase                                            | -                   | Putative peptidase                  | Genome Compator            |
| NEIS0594 |          | 38.2% | 35.0% | hypothetical protein                                          | Other loci          | Hypothetical protein                | Genome Comparator + PIRATE |
| NEIS0840 |          | 1.2%  | 0.8%  | phage related protein                                         | -                   | (Putative) phage associated protein | Genome Compator            |
| NEIS0953 | NEIS1664 | 27.6% | 17.3% | hypothetical protein                                          | -                   | (Putative) phage associated protein | Genome Comparator + PIRATE |
| NEIS0955 |          | 80.4% | 92.0% | hypothetical protein                                          | Other loci          | Nf4 phage island                    | Genome Comparator + PIRATE |
| NEIS1089 |          | 28.5% | 26.7% | hypothetical protein                                          | -                   | Hypothetical protein                | Genome Compator            |
| NEIS1193 |          | 91.1% | 92.1% | type III restriction-modification system endonuclease protein | Methyltransferases  | Methyltransferase                   | Genome Comparator + PIRATE |
| NEIS1194 |          | 90.8% | 90.7% | Type III restriction/modification system methyltransferase    | Methyltransferases  | Methyltransferase                   | Genome Comparator + PIRATE |
| NEIS1311 |          | 85.0% | 84.0% | putative type III restriction/modification system enzyme      | Methyltransferases  | Methyltransferase                   | Genome Compator            |
| NEIS1667 |          | 22.9% | 12.4% | hypothetical protein                                          | -                   | Nf4 phage island                    | Genome Comparator + PIRATE |
| NEIS2202 |          | 36.9% | 26.5% | DNA primase                                                   | Conjugative Plasmid | Conjugative Plasmid                 | Genome Comparator + PIRATE |

|          |       |       |                                       |                                            |                     |                            |
|----------|-------|-------|---------------------------------------|--------------------------------------------|---------------------|----------------------------|
| NEIS2203 | 37.5% | 27.1% | transcription elongation factor       | Conjugative Plasmid                        | Conjugative Plasmid | Genome Comparator + PIRATE |
| NEIS2204 | 37.6% | 27.2% | yegA / hypothetical protein           | Conjugative Plasmid                        | Conjugative Plasmid | Genome Comparator + PIRATE |
| NEIS2205 | 37.6% | 27.2% | hypothetical protein                  | Conjugative Plasmid                        | Conjugative Plasmid | Genome Comparator + PIRATE |
| NEIS2206 | 37.3% | 27.1% | hypothetical protein                  | Conjugative Plasmid                        | Conjugative Plasmid | Genome Comparator + PIRATE |
| NEIS2207 | 37.5% | 27.2% | hypothetical protein                  | Conjugative Plasmid                        | Conjugative Plasmid | Genome Comparator + PIRATE |
| NEIS2208 | 37.0% | 26.9% | putative DNA modification methylase   | Conjugative Plasmid/<br>Methyltransferases | Conjugative Plasmid | Genome Comparator + PIRATE |
| NEIS2209 | 37.4% | 27.1% | hypothetical protein                  | Conjugative Plasmid                        | Conjugative Plasmid | Genome Comparator + PIRATE |
| NEIS2210 | 22.9% | 14.3% | tetM / tetracyclin resistance protein | Conjugative Plasmid                        | Conjugative Plasmid | Genome Comparator + PIRATE |
| NEIS2211 | 22.6% | 13.8% | hypothetical protein                  | Conjugative Plasmid                        | Conjugative Plasmid | Genome Comparator + PIRATE |
| NEIS2212 | 22.4% | 13.8% | epsilon_2 antitoxin                   | Conjugative Plasmid                        | Conjugative Plasmid | Genome Comparator + PIRATE |
| NEIS2213 | 37.5% | 27.0% | zeta_2 toxin                          | Conjugative Plasmid                        | Conjugative Plasmid | Genome Comparator + PIRATE |
| NEIS2214 | 37.8% | 27.3% | -                                     | Conjugative Plasmid                        | Conjugative Plasmid | Genome Comparator + PIRATE |
| NEIS2215 | 37.3% | 26.9% | zeta_1 toxin                          | Conjugative Plasmid                        | Conjugative Plasmid | Genome Comparator + PIRATE |
| NEIS2216 | 37.6% | 27.2% | marR / transcriptional regulator      | Conjugative Plasmid                        | Conjugative Plasmid | Genome Comparator + PIRATE |
| NEIS2217 | 37.5% | 27.1% | res / putative resolvase              | Conjugative Plasmid                        | Conjugative Plasmid | Genome Comparator + PIRATE |



|          |       |       |                                                    |                     |                     |                            |
|----------|-------|-------|----------------------------------------------------|---------------------|---------------------|----------------------------|
| NEIS2218 | 37.5% | 27.2% | vapD / toxin                                       | Conjugative Plasmid | Conjugative Plasmid | Genome Comparator + PIRATE |
| NEIS2219 | 37.5% | 27.0% | trbN / lytic transglycosylase                      | Conjugative Plasmid | Conjugative Plasmid | Genome Comparator + PIRATE |
| NEIS2220 | 37.8% | 27.0% | trbM / involved in conjugative transfer            | Conjugative Plasmid | Conjugative Plasmid | Genome Comparator + PIRATE |
| NEIS2221 | 37.3% | 26.9% | trbL / virB6-like inner membrane protein           | Conjugative Plasmid | Conjugative Plasmid | Genome Compator            |
| NEIS2222 | 37.5% | 26.6% | trbK / putative entry exclusion protein            | Conjugative Plasmid | Conjugative Plasmid | Genome Compator            |
| NEIS2223 | 37.4% | 27.1% | trbJ                                               | Conjugative Plasmid | Conjugative Plasmid | Genome Comparator + PIRATE |
| NEIS2224 | 37.3% | 26.8% | trbI / virB10-like core complex component          | Conjugative Plasmid | Conjugative Plasmid | Genome Compator            |
| NEIS2225 | 37.6% | 27.2% | trbH / virB7-like core complex component           | Conjugative Plasmid | Conjugative Plasmid | Genome Comparator + PIRATE |
| NEIS2226 | 37.3% | 26.9% | trbG / virB9-like core complex component           | Conjugative Plasmid | Conjugative Plasmid | Genome Comparator + PIRATE |
| NEIS2227 | 37.5% | 27.1% | trbF / DNA transfer protein                        | Conjugative Plasmid | Conjugative Plasmid | Genome Comparator + PIRATE |
| NEIS2228 | 36.9% | 26.8% | trbE / virB4-like conjugal transfer ATPase         | Conjugative Plasmid | Conjugative Plasmid | Genome Comparator + PIRATE |
| NEIS2229 | 37.8% | 27.2% | trbD / similar to VirB3                            | Conjugative Plasmid | Conjugative Plasmid | Genome Comparator + PIRATE |
| NEIS2230 | 37.8% | 27.2% | trbC / virB2 prepilin                              | Conjugative Plasmid | Conjugative Plasmid | Genome Comparator + PIRATE |
| NEIS2231 | 37.3% | 26.8% | trbB / virB11-like conjugal transfer ATPase        | Conjugative Plasmid | Conjugative Plasmid | Genome Comparator + PIRATE |
| NEIS2232 | 37.9% | 27.2% | trbA / transcriptional repressor                   | Conjugative Plasmid | Conjugative Plasmid | Genome Comparator + PIRATE |
| NEIS2233 | 37.6% | 27.2% | ssb / putative single stranded DNA binding protein | Conjugative Plasmid | Conjugative Plasmid | Genome Comparator + PIRATE |

|          |       |       |                                          |                     |                     |                            |
|----------|-------|-------|------------------------------------------|---------------------|---------------------|----------------------------|
| NEIS2234 | 37.4% | 27.1% | trfA / oriV activator protein            | Conjugative Plasmid | Conjugative Plasmid | Genome Comparator + PIRATE |
| NEIS2235 | 37.8% | 27.2% | korC / regulator of plasmid partitioning | Conjugative Plasmid | Conjugative Plasmid | Genome Comparator + PIRATE |
| NEIS2236 | 37.6% | 27.2% | kleE / involved in plasmid partitioning  | Conjugative Plasmid | Conjugative Plasmid | Genome Comparator + PIRATE |
| NEIS2237 | 37.5% | 27.1% | incC2 / ATP binding protein              | Conjugative Plasmid | Conjugative Plasmid | Genome Comparator + PIRATE |
| NEIS2238 | 37.4% | 27.1% | parB / DNA binding protein               | Conjugative Plasmid | Conjugative Plasmid | Genome Comparator + PIRATE |
| NEIS2239 | 35.2% | 26.5% | kfrB / putative kfrB/traO                | Conjugative Plasmid | Conjugative Plasmid | Genome Comparator + PIRATE |
| NEIS2240 | 37.6% | 27.2% | kfrC / putative kfrC/traN protein        | Conjugative Plasmid | Conjugative Plasmid | Genome Comparator + PIRATE |
| NEIS2241 | 37.4% | 27.0% | traM / involved in conjugal transfer     | Conjugative Plasmid | Conjugative Plasmid | Genome Comparator + PIRATE |
| NEIS2242 | 37.4% | 27.1% | traL / involved in conjugal transfer     | Conjugative Plasmid | Conjugative Plasmid | Genome Comparator + PIRATE |
| NEIS2243 | 37.5% | 27.2% | traK / involved in conjugal transfer     | Conjugative Plasmid | Conjugative Plasmid | Genome Comparator + PIRATE |
| NEIS2244 | 37.9% | 27.2% | traJ / oriT                              | Conjugative Plasmid | Conjugative Plasmid | Genome Comparator + PIRATE |
| NEIS2245 | 37.1% | 26.6% | traI / DNA relaxase                      | Conjugative Plasmid | Conjugative Plasmid | Genome Comparator + PIRATE |
| NEIS2246 | 36.7% | 26.4% | traG / conjugal coupling protein         | Conjugative Plasmid | Conjugative Plasmid | Genome Comparator + PIRATE |
| NEIS2247 | 37.5% | 27.2% | traF / conjugal prepilin peptidase       | Conjugative Plasmid | Conjugative Plasmid | Genome Comparator + PIRATE |
| NEIS2248 | 37.5% | 26.9% | traD / DNA topoisomerase III             | Conjugative Plasmid | Conjugative Plasmid | Genome Comparator + PIRATE |
| NEIS2249 | 37.5% | 27.1% | traD / involved in conjugal transfer     | Conjugative Plasmid | Conjugative Plasmid | Genome Comparator + PIRATE |

|          |       |       |                                        |                              |                              |                               |
|----------|-------|-------|----------------------------------------|------------------------------|------------------------------|-------------------------------|
| NEIS2250 | 63.9% | 69.0% | traD / putative docking protein        | Gonococcal<br>Genetic Island | Gonococcal<br>Genetic Island | Genome Comparator +<br>PIRATE |
| NEIS2251 | 63.8% | 68.9% | traI / putative nicking enzyme         | Gonococcal<br>Genetic Island | Gonococcal<br>Genetic Island | Genome Comparator +<br>PIRATE |
| NEIS2252 | 63.9% | 68.9% | yaf / hypothetical protein             | Gonococcal<br>Genetic Island | Gonococcal<br>Genetic Island | Genome Comparator +<br>PIRATE |
| NEIS2253 | 63.9% | 68.9% | ltgX / peptidoglycan hydrolase         | Gonococcal<br>Genetic Island | Gonococcal<br>Genetic Island | Genome Comparator +<br>PIRATE |
| NEIS2254 | 63.9% | 69.0% | yag / outer membrane protein           | Gonococcal<br>Genetic Island | Gonococcal<br>Genetic Island | Genome Comparator +<br>PIRATE |
| NEIS2255 | 64.2% | 69.0% | traA / putative transfer protein       | Gonococcal<br>Genetic Island | Gonococcal<br>Genetic Island | Genome Comparator +<br>PIRATE |
| NEIS2256 | 64.1% | 69.0% | traL / pilus assembly                  | Gonococcal<br>Genetic Island | Gonococcal<br>Genetic Island | Genome Comparator +<br>PIRATE |
| NEIS2257 | 63.9% | 69.0% | traE / pilus biogenesis                | Gonococcal<br>Genetic Island | Gonococcal<br>Genetic Island | Genome Comparator +<br>PIRATE |
| NEIS2258 | 63.8% | 68.9% | traK / pilus assembly                  | Gonococcal<br>Genetic Island | Gonococcal<br>Genetic Island | Genome Comparator +<br>PIRATE |
| NEIS2259 | 63.8% | 68.8% | traB / conjugal transfer               | Gonococcal<br>Genetic Island | Gonococcal<br>Genetic Island | Genome Comparator +<br>PIRATE |
| NEIS2260 | 63.9% | 68.9% | dsbC / protein disulphide<br>isomerase | Gonococcal<br>Genetic Island | Gonococcal<br>Genetic Island | Genome Comparator +<br>PIRATE |
| NEIS2261 | 63.9% | 68.9% | traV / putative transfer protein       | Gonococcal<br>Genetic Island | Gonococcal<br>Genetic Island | Genome Comparator +<br>PIRATE |
| NEIS2262 | 63.7% | 68.7% | traC / pilus assembly                  | Gonococcal<br>Genetic Island | Gonococcal<br>Genetic Island | Genome Comparator +<br>PIRATE |
| NEIS2263 | 63.9% | 69.0% | ybe / hypothetical protein             | Gonococcal<br>Genetic Island | Gonococcal<br>Genetic Island | Genome Comparator +<br>PIRATE |
| NEIS2264 | 64.1% | 69.0% | trbI / conjugal transfer               | Gonococcal<br>Genetic Island | Gonococcal<br>Genetic Island | Genome Comparator +<br>PIRATE |
| NEIS2265 | 63.9% | 68.9% | traW / pilus biogenesis                | Gonococcal<br>Genetic Island | Gonococcal<br>Genetic Island | Genome Comparator +<br>PIRATE |

|          |       |       |                                                      |                              |                              |                               |
|----------|-------|-------|------------------------------------------------------|------------------------------|------------------------------|-------------------------------|
| NEIS2266 | 63.1% | 68.8% | traU / pulus biogenesis                              | Gonococcal<br>Genetic Island | Gonococcal<br>Genetic Island | Genome Comparator +<br>PIRATE |
| NEIS2267 | 63.7% | 68.7% | trbC / conjugative transfer                          | Gonococcal<br>Genetic Island | Gonococcal<br>Genetic Island | Genome Comparator +<br>PIRATE |
| NEIS2268 | 63.8% | 68.8% | ybi / mating-pair stabilisation                      | Gonococcal<br>Genetic Island | Gonococcal<br>Genetic Island | Genome Comparator +<br>PIRATE |
| NEIS2269 | 63.5% | 68.7% | traN / mating-pair stabilisation                     | Gonococcal<br>Genetic Island | Gonococcal<br>Genetic Island | Genome Comparator +<br>PIRATE |
| NEIS2270 | 63.8% | 68.8% | ycb / hypothetical protein                           | Gonococcal<br>Genetic Island | Gonococcal<br>Genetic Island | Genome Comparator +<br>PIRATE |
| NEIS2271 | 63.5% | 68.8% | traF / pilus assembly                                | Gonococcal<br>Genetic Island | Gonococcal<br>Genetic Island | Genome Comparator +<br>PIRATE |
| NEIS2272 | 63.8% | 68.8% | traH / pilus assembly                                | Gonococcal<br>Genetic Island | Gonococcal<br>Genetic Island | Genome Comparator +<br>PIRATE |
| NEIS2273 | 63.4% | 68.8% | traG / pilus assembly; mating-<br>pair stabilisation | Gonococcal<br>Genetic Island | Gonococcal<br>Genetic Island | Genome Comparator +<br>PIRATE |
| NEIS2274 | 58.0% | 61.5% | atIA / peptidoglycan<br>transglycosylase             | Gonococcal<br>Genetic Island | Gonococcal<br>Genetic Island | Genome Comparator +<br>PIRATE |
| NEIS2275 | 58.2% | 61.6% | ych / hypothetical protein                           | Gonococcal<br>Genetic Island | Gonococcal<br>Genetic Island | Genome Comparator +<br>PIRATE |
| NEIS2276 | 57.9% | 61.1% | exp1 / exported protein                              | Gonococcal<br>Genetic Island | Gonococcal<br>Genetic Island | Genome Compator               |
| NEIS2277 | 59.5% | 62.1% | cspA / RNA/ssDNA binding<br>protein                  | Gonococcal<br>Genetic Island | Gonococcal<br>Genetic Island | Genome Comparator +<br>PIRATE |
| NEIS2278 | 57.3% | 60.1% | exp2 / hypothetical protein                          | Gonococcal<br>Genetic Island | Gonococcal<br>Genetic Island | Genome Comparator +<br>PIRATE |
| NEIS2279 | 63.5% | 68.3% | yda / hypothetical protein                           | Gonococcal<br>Genetic Island | Gonococcal<br>Genetic Island | Genome Comparator +<br>PIRATE |
| NEIS2280 | 63.3% | 68.9% | ydbA / hypothetical protein                          | Gonococcal<br>Genetic Island | Gonococcal<br>Genetic Island | Genome Comparator +<br>PIRATE |
| NEIS2281 | 63.7% | 68.9% | ydbB / hypothetical protein                          | Gonococcal<br>Genetic Island | Gonococcal<br>Genetic Island | Genome Comparator +<br>PIRATE |

|          |       |       |                                        |                                                         |                              |                               |
|----------|-------|-------|----------------------------------------|---------------------------------------------------------|------------------------------|-------------------------------|
| NEIS2282 | 63.9% | 69.1% | ydcA / putative protease               | Gonococcal<br>Genetic Island                            | Gonococcal<br>Genetic Island | Genome Comparator +<br>PIRATE |
| NEIS2283 | 63.8% | 69.1% | ydcB / hypothetical protein            | Gonococcal<br>Genetic Island                            | Gonococcal<br>Genetic Island | Genome Comparator +<br>PIRATE |
| NEIS2284 | 63.9% | 69.1% | ydd / hypothetical protein             | Gonococcal<br>Genetic Island                            | Gonococcal<br>Genetic Island | Genome Comparator +<br>PIRATE |
| NEIS2285 | 63.9% | 69.2% | ydeA / hypothetical protein            | Gonococcal<br>Genetic Island                            | Gonococcal<br>Genetic Island | Genome Comparator +<br>PIRATE |
| NEIS2286 | 63.8% | 69.0% | ydeB / hypothetical protein            | Gonococcal<br>Genetic Island                            | Gonococcal<br>Genetic Island | Genome Comparator +<br>PIRATE |
| NEIS2287 | 63.7% | 69.0% | ydf / hypothetical protein             | Gonococcal<br>Genetic Island                            | Gonococcal<br>Genetic Island | Genome Comparator +<br>PIRATE |
| NEIS2288 | 63.9% | 69.0% | ydg / putative DNA methylase           | Gonococcal<br>Genetic Island/<br>Methyltransferase<br>s | Gonococcal<br>Genetic Island | Genome Comparator +<br>PIRATE |
| NEIS2289 | 63.1% | 68.9% | ydhA / putative DNA methylase          | Gonococcal<br>Genetic Island/<br>Methyltransferase<br>s | Gonococcal<br>Genetic Island | Genome Comparator +<br>PIRATE |
| NEIS2290 | 63.8% | 69.1% | ydhB / hypothetical protein            | Gonococcal<br>Genetic Island                            | Gonococcal<br>Genetic Island | Genome Comparator +<br>PIRATE |
| NEIS2291 | 63.7% | 69.0% | ydi / hypothetical protein             | Gonococcal<br>Genetic Island                            | Gonococcal<br>Genetic Island | Genome Comparator +<br>PIRATE |
| NEIS2292 | 62.9% | 68.7% | yea / putative helicase                | Gonococcal<br>Genetic Island                            | Gonococcal<br>Genetic Island | Genome Comparator +<br>PIRATE |
| NEIS2293 | 61.6% | 63.1% | yeb / putative N-<br>acetyltransferase | Gonococcal<br>Genetic Island                            | Gonococcal<br>Genetic Island | Genome Comparator +<br>PIRATE |
| NEIS2294 | 63.7% | 69.0% | yecA / hypothetical protein            | Gonococcal<br>Genetic Island                            | Gonococcal<br>Genetic Island | Genome Comparator +<br>PIRATE |
| NEIS2295 | 62.0% | 67.2% | yecB / repeat containing protein       | Gonococcal<br>Genetic Island                            | Gonococcal<br>Genetic Island | Genome Comparator +<br>PIRATE |

|          |       |       |                                               |                              |                              |                               |
|----------|-------|-------|-----------------------------------------------|------------------------------|------------------------------|-------------------------------|
| NEIS2296 | 63.8% | 69.1% | yedA / hypothetical protein                   | Gonococcal<br>Genetic Island | Gonococcal<br>Genetic Island | Genome Comparator +<br>PIRATE |
| NEIS2297 | 63.9% | 69.0% | yedB / hypothetical protein                   | Gonococcal<br>Genetic Island | Gonococcal<br>Genetic Island | Genome Comparator +<br>PIRATE |
| NEIS2298 | 64.1% | 69.1% | yee / hypothetical protein                    | Gonococcal<br>Genetic Island | Gonococcal<br>Genetic Island | Genome Compator               |
| NEIS2299 | 63.8% | 69.1% | yegA / hypothetical protein                   | Gonococcal<br>Genetic Island | Gonococcal<br>Genetic Island | Genome Comparator +<br>PIRATE |
| NEIS2300 | 63.9% | 69.2% | yegB / hypothetical protein                   | Gonococcal<br>Genetic Island | Gonococcal<br>Genetic Island | Genome Compator               |
| NEIS2301 | 61.2% | 67.8% | yeh / hypothetical protein                    | Gonococcal<br>Genetic Island | Gonococcal<br>Genetic Island | Genome Comparator +<br>PIRATE |
| NEIS2302 | 63.7% | 68.9% | topB / DNA topoisomerase                      | Gonococcal<br>Genetic Island | Gonococcal<br>Genetic Island | Genome Comparator +<br>PIRATE |
| NEIS2303 | 64.2% | 69.1% | ssbB / single-stranded DNA<br>binding protein | Gonococcal<br>Genetic Island | Gonococcal<br>Genetic Island | Genome Comparator +<br>PIRATE |
| NEIS2304 | 63.8% | 68.6% | yfa / hypothetical protein                    | Gonococcal<br>Genetic Island | Gonococcal<br>Genetic Island | Genome Comparator +<br>PIRATE |
| NEIS2305 | 63.9% | 68.9% | yfb / hypothetical protein                    | Gonococcal<br>Genetic Island | Gonococcal<br>Genetic Island | Genome Comparator +<br>PIRATE |
| NEIS2306 | 63.9% | 68.9% | yfd / putative tonB-like<br>transporter       | Gonococcal<br>Genetic Island | Gonococcal<br>Genetic Island | Genome Comparator +<br>PIRATE |
| NEIS2307 | 63.3% | 69.0% | yfeA / hypothetical protein                   | Gonococcal<br>Genetic Island | Gonococcal<br>Genetic Island | Genome Comparator +<br>PIRATE |
| NEIS2308 | 64.1% | 68.9% | yfeB / hypothetical protein                   | Gonococcal<br>Genetic Island | Gonococcal<br>Genetic Island | Genome Comparator +<br>PIRATE |
| NEIS2309 | 64.1% | 69.0% | parB / chromosome partitioning                | Gonococcal<br>Genetic Island | Gonococcal<br>Genetic Island | Genome Comparator +<br>PIRATE |
| NEIS2310 | 63.5% | 68.9% | parA / chromosome partitioning                | Gonococcal<br>Genetic Island | Gonococcal<br>Genetic Island | Genome Comparator +<br>PIRATE |
| NEIS2311 | 5.6%  | 7.5%  | eppA / hypothetical protein                   | Gonococcal<br>Genetic Island | Gonococcal<br>Genetic Island | Genome Comparator +<br>PIRATE |

|          |       |       |                             |                           |                           |                            |
|----------|-------|-------|-----------------------------|---------------------------|---------------------------|----------------------------|
| NEIS2312 | 5.6%  | 7.5%  | ych1 / hypothetical protein | Gonococcal Genetic Island | Gonococcal Genetic Island | Genome Comparator + PIRATE |
| NEIS2313 | 64.1% | 69.1% | hypothetical protein        | Gonococcal Genetic Island | Gonococcal Genetic Island | Genome Comparator + PIRATE |
| NEIS2314 | 63.9% | 69.1% | hypothetical protein        | Gonococcal Genetic Island | Gonococcal Genetic Island | Genome Comparator + PIRATE |
| NEIS2315 | 64.1% | 69.1% | conjugal transfer protein   | Gonococcal Genetic Island | Gonococcal Genetic Island | Genome Comparator + PIRATE |
| NEIS2323 | 1.2%  | 0.7%  | -                           | VirB T4SS                 | VirB T4SS                 | Genome Comparator + PIRATE |
| NEIS2324 | 1.2%  | 0.7%  | -                           | VirB T4SS                 | VirB T4SS                 | Genome Comparator + PIRATE |
| NEIS2325 | 1.2%  | 0.6%  | -                           | VirB T4SS                 | VirB T4SS                 | Genome Comparator          |
| NEIS2326 | 1.2%  | 0.6%  | -                           | VirB T4SS                 | VirB T4SS                 | Genome Comparator + PIRATE |
| NEIS2327 | 1.2%  | 0.7%  | -                           | VirB T4SS                 | VirB T4SS                 | Genome Comparator + PIRATE |
| NEIS2328 | 1.2%  | 0.7%  | -                           | VirB T4SS                 | VirB T4SS                 | Genome Comparator + PIRATE |
| NEIS2329 | 1.2%  | 0.7%  | -                           | VirB T4SS                 | VirB T4SS                 | Genome Comparator + PIRATE |
| NEIS2330 | 1.2%  | 0.7%  | -                           | VirB T4SS                 | VirB T4SS                 | Genome Comparator + PIRATE |
| NEIS2331 | 1.2%  | 0.7%  | -                           | VirB T4SS                 | VirB T4SS                 | Genome Comparator + PIRATE |
| NEIS2332 | 1.2%  | 0.7%  | -                           | VirB T4SS                 | VirB T4SS                 | Genome Comparator + PIRATE |
| NEIS2333 | 1.2%  | 0.7%  | -                           | VirB T4SS                 | VirB T4SS                 | Genome Comparator + PIRATE |
| NEIS2334 | 1.2%  | 0.7%  | -                           | VirB T4SS                 | VirB T4SS                 | Genome Comparator + PIRATE |
| NEIS2335 | 1.2%  | 0.7%  | -                           | VirB T4SS                 | VirB T4SS                 | Genome Comparator + PIRATE |

|          |       |       |                |                        |                        |                            |
|----------|-------|-------|----------------|------------------------|------------------------|----------------------------|
| NEIS2336 | 1.2%  | 0.7%  | -              | VirB T4SS              | VirB T4SS              | Genome Comparator + PIRATE |
| NEIS2337 | 1.2%  | 0.7%  | -              | VirB T4SS              | VirB T4SS              | Genome Comparator + PIRATE |
| NEIS2338 | 1.2%  | 0.7%  | -              | VirB T4SS              | VirB T4SS              | Genome Comparator + PIRATE |
| NEIS2339 | 1.2%  | 0.7%  | -              | VirB T4SS              | VirB T4SS              | Genome Comparator + PIRATE |
| NEIS2342 | 1.2%  | 0.7%  | -              | VirB T4SS              | VirB T4SS              | Genome Comparator + PIRATE |
| NEIS2343 | 1.2%  | 0.7%  | -              | VirB T4SS              | VirB T4SS              | Genome Comparator + PIRATE |
| NEIS2345 | 88.4% | 93.5% | -              | VirB T4SS              | VirB T4SS              | Genome Comparator + PIRATE |
| NEIS2348 | 1.2%  | 0.7%  | -              | VirB T4SS              | VirB T4SS              | Genome Comparator + PIRATE |
| NEIS2350 | 1.2%  | 0.7%  | -              | VirB T4SS              | VirB T4SS              | Genome Comparator + PIRATE |
| NEIS2351 | 1.2%  | 0.7%  | -              | VirB T4SS              | VirB T4SS              | Genome Comparator + PIRATE |
| NEIS2352 | 1.2%  | 0.7%  | -              | VirB T4SS              | VirB T4SS              | Genome Comparator + PIRATE |
| NEIS2353 | 1.2%  | 0.7%  | -              | VirB T4SS              | VirB T4SS              | Genome Compator            |
| NEIS2354 | 1.2%  | 0.7%  | -              | VirB T4SS              | VirB T4SS              | Genome Comparator + PIRATE |
| NEIS2356 | 15.4% | 13.5% | -              | Conjugative Plasmid    | Conjugative Plasmid    | Genome Compator            |
| NEIS2357 | 16.3% | 10.6% | beta lactamase | Beta-lactamase plasmid | Beta-lactamase plasmid | Genome Comparator + PIRATE |
| NEIS2358 | 19.1% | 11.1% | replicase A    | Beta-lactamase plasmid | Beta-lactamase plasmid | Genome Comparator + PIRATE |
| NEIS2359 | 19.2% | 11.3% | resolvase      | Beta-lactamase plasmid | Beta-lactamase plasmid | Genome Comparator + PIRATE |



|          |          |       |       |                                                         |                        |                                     |                            |
|----------|----------|-------|-------|---------------------------------------------------------|------------------------|-------------------------------------|----------------------------|
| NEIS2360 |          | 7.2%  | 3.4%  | -                                                       | Beta-lactamase plasmid | Beta-lactamase plasmid              | Genome Comparator + PIRATE |
| NEIS2451 | NEIS2461 | 3.7%  | 3.6%  | hypothetical protein                                    | Other loci             | Nf1 phage island                    | Genome Compator            |
| NEIS2486 |          | 89.2% | 90.8% | conserved hypothetical protein                          | Other loci             | Hypothetical protein                | Genome Comparator + PIRATE |
| NEIS2582 |          | 20.4% | 19.2% | hypothetical protein                                    | Other loci             | Hypothetical protein                | Genome Comparator + PIRATE |
| NEIS2615 |          | 49.0% | 60.1% | hypothetical protein, putative phage associated protein | Other loci             | (Putative) phage associated protein | Genome Comparator + PIRATE |
| NEIS2616 |          | 65.8% | 80.5% | replicative DNA helicase                                | Other loci             | (Putative) phage associated protein | Genome Comparator + PIRATE |
| NEIS2618 |          | 39.3% | 64.6% | hypothetical protein, putative phage associated protein | Other loci             | (Putative) phage associated protein | Genome Comparator + PIRATE |
| NEIS2619 |          | 50.5% | 58.5% | hypothetical protein, putative phage associated protein | Other loci             | (Putative) phage associated protein | Genome Comparator + PIRATE |
| NEIS2621 |          | 4.7%  | 5.9%  | hypothetical protein, putative phage associated protein | Other loci             | (Putative) phage associated protein | Genome Comparator + PIRATE |
| NEIS2640 |          | 26.0% | 22.6% | hypothetical protein, putative phage associated protein | Other loci             | (Putative) phage associated protein | Genome Compator            |
| NEIS2643 |          | 49.8% | 73.4% | hypothetical protein, putative phage associated protein | Other loci             | (Putative) phage associated protein | Genome Comparator + PIRATE |
| NEIS2646 |          | 4.7%  | 2.7%  | putative TonB-dependent receptor                        | Other loci             | TonB dependent receptor             | Genome Compator            |
| NEIS2647 |          | 5.4%  | 3.8%  | hypothetical protein                                    | Other loci             | TonB dependent receptor             | Genome Compator            |

|          |       |       |                                                                   |                        |                                     |                            |
|----------|-------|-------|-------------------------------------------------------------------|------------------------|-------------------------------------|----------------------------|
| NEIS2666 | 82.6% | 86.7% | hypothetical protein                                              | Other loci             | Hypothetical protein                | Genome Comparator + PIRATE |
| NEIS2691 | 87.7% | 88.5% | restriction endonuclease R.NgoMIII                                | Methyltransferase s    | Methyltransferase                   | Genome Comparator + PIRATE |
| NEIS2692 | 87.5% | 88.5% | DNA cytosine methyltransferase M.NgoMIII                          | Methyltransferase s    | Methyltransferase                   | Genome Comparator + PIRATE |
| NEIS2693 | 82.5% | 82.7% | conserved hypothetical protein, putative phage associated protein | Other loci             | Nf4 phage island                    | Genome Comparator + PIRATE |
| NEIS2705 | 56.9% | 50.0% | hypothetical protein                                              | Other loci             | Hypothetical protein                | Genome Compator            |
| NEIS2713 | 28.4% | 22.3% | phage associated protein                                          | Other loci             | (Putative) phage associated protein | Genome Comparator + PIRATE |
| NEIS2714 | 55.2% | 59.6% | phage associated protein                                          | Other loci             | (Putative) phage associated protein | Genome Comparator + PIRATE |
| NEIS2718 | 47.7% | 68.3% | phage associated protein                                          | Other loci             | (Putative) phage associated protein | Genome Compator            |
| NEIS2744 | 94.2% | 94.2% | TonB dependent receptor (SLAM)                                    | Other loci             | TonB dependent receptor             | Genome Compator            |
| NEIS2859 | 8.8%  | 24.3% | hypothetical protein                                              | Other loci             | Hypothetical protein                | Genome Comparator + PIRATE |
| NEIS2960 | 19.5% | 12.1% | hypothetical protein                                              | Beta-lactamase plasmid | Beta-lactamase plasmid              | Genome Compator            |
| NEIS2961 | 14.0% | 8.3%  | DNA strand transferase                                            | Beta-lactamase plasmid | Beta-lactamase plasmid              | Genome Comparator + PIRATE |
| NEIS2962 | 13.3% | 8.8%  | hypothetical protein                                              | Beta-lactamase plasmid | Beta-lactamase plasmid              | Genome Comparator + PIRATE |
| NEIS2964 | 19.0% | 11.3% | hypothetical protein                                              | Beta-lactamase plasmid | Beta-lactamase plasmid              | Genome Comparator + PIRATE |

|          |       |       |                                                       |                                     |        |
|----------|-------|-------|-------------------------------------------------------|-------------------------------------|--------|
| NEIS3177 | 0.7%  | 1.5%  | (Putative) phage associated protein                   | Phage island X                      | PIRATE |
| NEIS3178 | 26.7% | 38.6% | Hypothetical protein                                  | Hypothetical protein                | PIRATE |
| NEIS3179 | 74.6% | 93.6% | Hypothetical protein                                  | Hypothetical protein                | PIRATE |
| NEIS3180 | 85.9% | 79.5% | Hypothetical protein                                  | Hypothetical protein                | PIRATE |
| NEIS3181 | 93.1% | 89.5% | (Putative) phage associated protein                   | (Putative) phage associated protein | PIRATE |
| NEIS3182 | 40.0% | 57.6% | Restriction modification enzyme                       | Methyltransferase                   | PIRATE |
| NEIS3183 | 78.3% | 93.5% | Hypothetical protein                                  | Hypothetical protein                | PIRATE |
| NEIS3184 | 74.2% | 70.8% | Histone deacetylase                                   | DNA transcription                   | PIRATE |
| NEIS3186 | 0.5%  | 1.2%  | (Putative) phage associated protein                   | Phage island X                      | PIRATE |
| NEIS3188 | 27.6% | 32.9% | Type IV toxin-antitoxin system, putative AbiEii toxin | Toxin-antitoxin system              | PIRATE |
| NEIS3189 | 87.1% | 93.9% | TspB virulence factor                                 | TspB virulence factor               | PIRATE |
| NEIS3190 | 4.7%  | 2.3%  | Hypothetical protein                                  | Conjugative Plasmid                 | PIRATE |
| NEIS3192 | 17.8% | 16.2% | Hypothetical protein                                  | Gonococcal Genetic Island           | PIRATE |
| NEIS3193 | 70.8% | 80.8% | Hypothetical protein                                  | Hypothetical protein                | PIRATE |
| NEIS3195 | 0.7%  | 1.5%  | Hypothetical protein                                  | Phage island X                      | PIRATE |
| NEIS3196 | 89.8% | 90.6% | Hypothetical protein                                  | Hypothetical protein                | PIRATE |

|          |       |       |                                            |                                     |        |
|----------|-------|-------|--------------------------------------------|-------------------------------------|--------|
| NEIS3197 | 94.5% | 94.4% | Hypothetical protein                       | Hypothetical protein                | PIRATE |
| NEIS3198 | 59.7% | 81.7% | Hypothetical protein                       | Hypothetical protein                | PIRATE |
| NEIS3200 | 37.6% | 30.1% | Hypothetical protein                       | Hypothetical protein                | PIRATE |
| NEIS3202 | 1.6%  | 1.7%  | DNA replication protein                    | DNA replication                     | PIRATE |
| NEIS3203 | 1.4%  | 2.0%  | (Putative) phage associated protein        | (Putative) phage associated protein | PIRATE |
| NEIS3204 | 0.7%  | 1.5%  | (Putative) phage associated protein        | Phage island X                      | PIRATE |
| NEIS3205 | 1.6%  | 2.1%  | (Putative) phage associated protein        | (Putative) phage associated protein | PIRATE |
| NEIS3206 | 44.3% | 27.4% | Hypothetical protein                       | Hypothetical protein                | PIRATE |
| NEIS3207 | 0.7%  | 1.6%  | Hypothetical protein                       | Phage island X                      | PIRATE |
| NEIS3208 | 67.1% | 71.0% | Hypothetical protein                       | Hypothetical protein                | PIRATE |
| NEIS3209 | 61.0% | 61.8% | Hypothetical protein                       | Hypothetical protein                | PIRATE |
| NEIS3210 | 23.0% | 23.8% | Hypothetical protein                       | Hypothetical protein                | PIRATE |
| NEIS3211 | 26.3% | 30.9% | Helix-turn-helix transcriptional regulator | DNA transcription                   | PIRATE |
| NEIS3212 | 1.2%  | 0.7%  | Hypothetical protein                       | VirB T4SS                           | PIRATE |
| NEIS3213 | 2.4%  | 1.4%  | DUF domain-containing protein              | Hypothetical protein                | PIRATE |
| NEIS3214 | 24.1% | 20.3% | (Putative) phage associated protein        | (Putative) phage associated protein | PIRATE |

|          |       |       |                                                                                    |                                     |        |
|----------|-------|-------|------------------------------------------------------------------------------------|-------------------------------------|--------|
| NEIS3215 | 84.8% | 88.0% | Hypothetical protein                                                               | Hypothetical protein                | PIRATE |
| NEIS3216 | 12.5% | 13.8% | Hypothetical protein                                                               | Hypothetical protein                | PIRATE |
| NEIS3217 | 1.8%  | 2.0%  | DUF domain-containing protein                                                      | Hypothetical protein                | PIRATE |
| NEIS3218 | 94.4% | 94.4% | (Putative) phage associated protein                                                | (Putative) phage associated protein | PIRATE |
| NEIS3219 | 1.4%  | 2.1%  | Hypothetical protein                                                               | Hypothetical protein                | PIRATE |
| NEIS3220 | 94.0% | 89.7% | Helix-turn-helix transcriptional regulator                                         | DNA transcription                   | PIRATE |
| NEIS3221 | 1.6%  | 2.2%  | (Putative) phage associated protein                                                | (Putative) phage associated protein | PIRATE |
| NEIS3222 | 0.7%  | 1.5%  | Hypothetical protein                                                               | Phage island X                      | PIRATE |
| NEIS3223 | 24.1% | 20.3% | Hypothetical protein                                                               | Hypothetical protein                | PIRATE |
| NEIS3224 | 0.7%  | 1.6%  | Hypothetical protein                                                               | Phage island X                      | PIRATE |
| NEIS3225 | 1.2%  | 0.7%  | ssDNA binding protein                                                              | VirB T4SS                           | PIRATE |
| NEIS3226 | 0.8%  | 0.8%  | Membrane protein                                                                   | Membrane protein                    | PIRATE |
| NEIS3227 | 9.4%  | 7.3%  | Helix-turn-helix transcriptional regulator                                         | Conjugative Plasmid                 | PIRATE |
| NEIS3228 | 86.8% | 94.0% | Hypothetical protein                                                               | Hypothetical protein                | PIRATE |
| NEIS3230 | 1.2%  | 0.7%  | Hypothetical protein                                                               | VirB T4SS                           | PIRATE |
| NEIS3231 | 1.2%  | 0.7%  | Type II toxin-antitoxin system - Plasmid stabilization system protein - parE toxin | VirB T4SS                           | PIRATE |
| NEIS3232 | 27.7% | 32.9% | Type II toxin-antitoxin system - vapC family protein                               | Toxin-antitoxin system              | PIRATE |

|          |       |       |                      |                      |        |
|----------|-------|-------|----------------------|----------------------|--------|
| NEIS3233 | 94.6% | 94.5% | Hypothetical protein | Hypothetical protein | PIRATE |
| NEIS3234 | 59.1% | 93.8% | Hypothetical protein | Hypothetical protein | PIRATE |

| Legend                                                                            |                           |
|-----------------------------------------------------------------------------------|---------------------------|
|  | Phage associated          |
|  | Hypothetical proteins     |
|  | Mobile Genetic Elements   |
|  | Toxin-antitoxin system    |
|  | Methyltransferases        |
|  | Putative secretion system |
|  | TonB dependent receptor   |
|  | DNA transcription         |
|  | Other functions           |

Table S3. Significance of associations between cgMLST and accessory elements.

| CgMLST group | Number of isolates | Gonococcal Genetic Island |              |       | Conjugative plasmid |              |       | Beta-lactamase plasmid |              |       | VirB T4SS  |              |       | Nf1 phage island |              |       | Putative secretion system |              |       |
|--------------|--------------------|---------------------------|--------------|-------|---------------------|--------------|-------|------------------------|--------------|-------|------------|--------------|-------|------------------|--------------|-------|---------------------------|--------------|-------|
|              |                    | Prevalence                | adj. p-value | sign. | Prevalence          | adj. p-value | sign. | Prevalence             | adj. p-value | sign. | Prevalence | adj. p-value | sign. | Prevalence       | adj. p-value | sign. | Prevalence                | adj. p-value | sign. |
| 3            | 1452               | 99%                       | 1.89E-236    | ****  | 0%                  | 1.89E-212    | ****  | 1%                     | 9.56E-54     | ****  | 0%         | 0.0103       | *     | 0%               | 7.33E-24     | ****  | 97%                       | 0            | ****  |
| 16           | 1433               | 20%                       | 0            | ****  | 0%                  | 1.43E-216    | ****  | 0%                     | 1.54E-74     | ****  | 0%         | 0.0105       | *     | 0%               | 2.14E-23     | ****  | 92%                       | 0            | ****  |
| 18           | 357                | 90%                       | 6.93E-20     | ****  | 1%                  | 9.91E-40     | ****  | 2%                     | 1.42E-09     | ****  | 0%         | 1            |       | 15%              | 1.93E-18     | ****  | 0%                        | 3.79E-104    | ****  |
| 196          | 311                | 100%                      | 2.04E-47     | ****  | 4%                  | 1.54E-24     | ****  | 0%                     | 1.01E-12     | ****  | 0%         | 1            |       | 0%               | 0.0039       | **    | 0%                        | 5.57E-90     | ****  |
| 21           | 289                | 41%                       | 1.12E-20     | ****  | 93%                 | 8.68E-130    | ****  | 77%                    | 3.11E-158    | ****  | 0%         | 1            |       | 0%               | 0.0087       | **    | 0%                        | 1.87E-83     | ****  |
| 8            | 267                | 52%                       | 5.57E-07     | ****  | 0%                  | 1.74E-33     | ****  | 0%                     | 7.66E-12     | ****  | 0%         | 1            |       | 0%               | 0.0197       | *     | 95%                       | 2.79E-62     | ****  |
| 133          | 239                | 59%                       | 0.4340       |       | 100%                | 4.49E-138    | ****  | 31%                    | 5.35E-15     | ****  | 0%         | 1            |       | 0%               | 0.0693       |       | 93%                       | 8.03E-49     | ****  |
| 41           | 234                | 99%                       | 8.89E-33     | ****  | 100%                | 3.29E-132    | ****  | 48%                    | 1.28E-44     | ****  | 0%         | 1            |       | 0%               | 0.0665       |       | 0%                        | 1.71E-64     | ****  |
| 223          | 231                | 99%                       | 2.47E-32     | ****  | 1%                  | 6.78E-27     | ****  | 0%                     | 1.73E-08     | ****  | 0%         | 1            |       | 0%               | 0.1080       |       | 0%                        | 7.73E-66     | ****  |
| 24           | 204                | 100%                      | 1.85E-31     | ****  | 2%                  | 3.71E-19     | ****  | 0%                     | 1.07E-08     | ****  | 0%         | 1            |       | 0%               | 0.2260       |       | 0%                        | 6.1E-58      | ****  |
| 414          | 190                | 100%                      | 3.49E-29     | ****  | 7%                  | 2.79E-10     | ****  | 1%                     | 1.61E-06     | ****  | 0%         | 1            |       | 0%               | 0            |       | 0%                        | 9.19E-54     | ****  |
| 17           | 166                | 81%                       | 0.1680       |       | 1%                  | 6.35E-18     | ****  | 1%                     | 0.0003       | ***   | 0%         | 1            |       | 0%               | 1            |       | 95%                       | 1.05E-36     | ****  |
| 219          | 159                | 9%                        | 9.39E-56     | ****  | 1%                  | 1.64E-18     | ****  | 4%                     | 1            |       | 0%         | 1            |       | 0%               | 1            |       | 0%                        | 1.79E-44     | ****  |
| 446          | 159                | 100%                      | 3.54E-24     | ****  | 100%                | 2.71E-90     | ****  | 1%                     | 0            | ***   | 0%         | 1            |       | 0%               | 1            |       | 1%                        | 2.32E-42     | ****  |
| 31           | 119                | 54%                       | 0.1550       |       | 12%                 | 0.0162       | *     | 1%                     | 5.65E-03     | **    | 0%         | 1            |       | 0%               | 1            |       | 74%                       | 3.71E-06     | ****  |
| 62           | 115                | 12%                       | 7.73E-35     | ****  | 100%                | 1.87E-64     | ****  | 47%                    | 4.59E-20     | ****  | 0%         | 1            |       | 0%               | 1            |       | 1%                        | 1.32E-29     | ****  |
| 516          | 104                | 100%                      | 4.37E-15     | ****  | 0%                  | 1.35E-12     | ****  | 34%                    | 1.44E-07     | ****  | 0%         | 1            |       | 0%               | 1            |       | 0%                        | 2.1E-28      | ****  |
| 243          | 90                 | 100%                      | 7.91E-13     | ****  | 76%                 | 2.35E-19     | ****  | 2%                     | 1            |       | 0%         | 1            |       | 0%               | 1            |       | 0%                        | 2.89E-24     | ****  |
| 425          | 74                 | 100%                      | 4.14E-10     | ****  | 49%                 | 0.0251       | *     | 3%                     | 1            |       | 0%         | 1            |       | 1%               | 1            |       | 1%                        | 1.01E-17     | ****  |
| 415          | 73                 | 100%                      | 7.61E-10     | ****  | 1%                  | 1.22E-06     | ****  | 0%                     | 0            |       | 0%         | 1            |       | 100%             | 1.02E-107    | ****  | 0%                        | 3.36E-19     | ****  |
| 450          | 70                 | 97%                       | 1.14E-06     | ****  | 100%                | 2.43E-38     | ****  | 1%                     | 1            |       | 1%         | 1            |       | 0%               | 1            |       | 0%                        | 2.69E-18     | ****  |
| 416          | 63                 | 8%                        | 6.6E-22      | ****  | 100%                | 2.64E-34     | ****  | 33%                    | 0.0005       | ***   | 0%         | 1            |       | 0%               | 1            |       | 0%                        | 1.68E-16     | ****  |
| 37           | 52                 | 100%                      | 1.67E-06     | ****  | 88%                 | 5.1E-18      | ****  | 79%                    | 1.27E-27     | ****  | 0%         | 1            |       | 0%               | 1            |       | 2%                        | 1.33E-11     | ****  |
| 44           | 50                 | 100%                      | 2.69E-06     | ****  | 14%                 | 1            |       | 0%                     | 1            |       | 0%         | 1            |       | 0%               | 1            |       | 0%                        | 1.01E-12     | ****  |
| 95           | 47                 | 32%                       | 5.22E-05     | ****  | 66%                 | 7.2E-06      | ****  | 4%                     | 1            |       | 0%         | 1            |       | 0%               | 1            |       | 98%                       | 2.38E-11     | ****  |
| 34           | 46                 | 98%                       | 0.0003       | ***   | 0%                  | 2.01E-04     | ***   | 0%                     | 1            |       | 0%         | 1            |       | 0%               | 1            |       | 89%                       | 1.7E-06      | ****  |
| 498          | 42                 | 100%                      | 0.0001       | ****  | 100%                | 3.01E-22     | ****  | 17%                    | 1            |       | 0%         | 1            |       | 0%               | 1            |       | 0%                        | 2.13E-10     | ****  |
| 439          | 39                 | 5%                        | 1.24E-14     | ****  | 90%                 | 7.48E-14     | ****  | 0%                     | 1            |       | 0%         | 1            |       | 0%               | 1            |       | 0%                        | 1.59E-09     | ****  |

|                                  |             |            |          |      |            |          |      |            |          |      |             |   |  |             |         |      |            |          |      |
|----------------------------------|-------------|------------|----------|------|------------|----------|------|------------|----------|------|-------------|---|--|-------------|---------|------|------------|----------|------|
| <b>304</b>                       | 38          | 97%        | 0.0059   | **   | 100%       | 5.87E-20 | **** | 3%         | 1        |      | 5%          | 1 |  | 89%         | 2.3E-43 | **** | 0%         | 3.11E-09 | **** |
| <b>239</b>                       | 35          | 9%         | 2.79E-11 | **** | 100%       | 3.04E-18 | **** | 83%        | 2.66E-20 | **** | 0%          | 1 |  | 0%          | 1       |      | 91%        | 3.06E-05 | **** |
| <b>Other</b>                     | 675         |            |          |      |            |          |      |            |          |      |             |   |  |             |         |      |            |          |      |
| <b>No<br/>cgMLST<br/>assigne</b> | 601         |            |          |      |            |          |      |            |          |      |             |   |  |             |         |      |            |          |      |
| <b>Overall<br/>prevalence</b>    | <b>8013</b> | <b>69%</b> |          |      | <b>27%</b> |          |      | <b>11%</b> |          |      | <b>0.7%</b> |   |  | <b>3.6%</b> |         |      | <b>49%</b> |          |      |

Adjusted p-values were calculated by multiplying the original p-value by the number of core genome groups tested (n=250). \*p<0.05; \*\*p<0.01; \*\*\*p<0.001; \*\*\*\*p<0.0001

- significantly less prevalent in cgMLST group compared to distribution among all isolates
- significantly more prevalent in cgMLST group compared to distribution among all isolates



**Table S4. Significance of associations between accessory elements and antimicrobial resistance against penicillin, tetracycline, ciprofloxacin, ceftriaxone, cefixime and azithromycin.**

|              | MIC                 | Number of isolates | Gonococcal genetic island |              |       | Conjugative plasmid |              |       | Betalactamase plasmid |              |       | virB T4SS  |              |       | Nf1 phage island |              |       | Putative secretion system |              |       |
|--------------|---------------------|--------------------|---------------------------|--------------|-------|---------------------|--------------|-------|-----------------------|--------------|-------|------------|--------------|-------|------------------|--------------|-------|---------------------------|--------------|-------|
|              |                     |                    | prevalence                | adj. p-value | sign. | prevalence          | adj. p-value | sign. | prevalence            | adj. p-value | sign. | prevalence | adj. p-value | sign. | prevalence       | adj. p-value | sign. | prevalence                | adj. p-value | sign. |
| <b>PEN S</b> | <b>≤0.06</b>        | <b>117</b>         | 88.89%                    | 6.66E-13     | ****  | 31.63%              | 4.69E-07     | ****  | 0.02%                 | 5.87E-132    | ****  | 6.84%      | 2.00E-06     | ****  | 6.83%            | 0.4890       |       | 16.24%                    | 8.28E-14     | ****  |
| <b>PEN I</b> | <b>&gt;0.06-1.0</b> | <b>1896</b>        | 63.98%                    |              |       | 23.42%              |              |       | 1.85%                 |              |       | 1.21%      |              |       | 3.38%            |              |       | 51.85%                    |              |       |
| <b>PEN R</b> | <b>&gt;1.0</b>      | <b>1074</b>        | 74.02%                    |              |       | 32.96%              |              |       | 32.68%                |              |       | 0.19%      |              |       | 2.79%            |              |       | 53.26%                    |              |       |
| <b>TET S</b> | <b>≤0.5</b>         | <b>774</b>         | 74.29%                    | 0.0002       | ***   | 23.00%              | 0.0474       | *     | 8.14%                 | 5.26E-05     | ****  | 2.45%      | 0.0003       | ***   | 3.62%            | 1            |       | 36.56%                    | 1.12E-21     | ****  |
| <b>TET R</b> | <b>&gt;0.5</b>      | <b>2143</b>        | 66.17%                    |              |       | 27.95%              |              |       | 14.19%                |              |       | 0.56%      |              |       | 3.13%            |              |       | 56.98%                    |              |       |
| <b>CIP S</b> | <b>≤0.03</b>        | <b>2098</b>        | 65.3%                     | 0.0034       | **    | 26.02%              | 0.2568       |       | 5.82%                 | 8.28E-26     | ****  | 1.76%      | 5.66E-12     | ****  | 3.43%            | 0.0030       | **    | 41.56%                    | 1.07E-21     | ****  |
| <b>CIP R</b> | <b>&gt;0.06</b>     | <b>2316</b>        | 70.16%                    |              |       | 28.76%              |              |       | 15.67%                |              |       | 0.00%      |              |       | 1.77%            |              |       | 56.26%                    |              |       |
| <b>CRO S</b> | <b>≤0.125</b>       | <b>4868</b>        | 67.46%                    | 0.1224       |       | 25.84%              | 1            |       | 10.56%                | 0.9600       |       | 0.64%      | 1            |       | 2.28%            | 1            |       | 50.92%                    | 0.1032       |       |
| <b>CRO R</b> | <b>&gt;0.125</b>    | <b>22</b>          | 90.9%                     |              |       | 13.64%              |              |       | 0.00%                 |              |       | 0.00%      |              |       | 0.00%            |              |       | 77.27%                    |              |       |
| <b>CFX S</b> | <b>≤0.125</b>       | <b>4004</b>        | 65.86%                    | 2.08E-19     | ****  | 29.00%              | 5.50E-52     | ****  | 12.01%                | 7.86E-21     | ****  | 0.85%      | 0.2760       |       | 2.7%             | 3.37E-05     | ****  | 46.55%                    | 6.84E-98     | ****  |
| <b>CFX R</b> | <b>&gt;0.125</b>    | <b>490</b>         | 85.31%                    |              |       | 2.04%               |              |       | 0.61%                 |              |       | 0.00%      |              |       | 0.00%            |              |       | 93.06%                    |              |       |
| <b>AZI S</b> | <b>&lt;1.0</b>      | <b>3547</b>        | 70.99%                    | 1.78E-09     | ****  | 29.01%              | 2.89E-47     | ****  | 12.52%                | 2.19E-23     | ****  | 0.93%      | 0.1950       |       | 2.68%            | 0.2292       |       | 44.8%                     | 7.08E-61     | ****  |
| <b>AZI R</b> | <b>≥1.0</b>         | <b>898</b>         | 59.91%                    |              |       | 7.57%               |              |       | 2.34%                 |              |       | 0.22%      |              |       | 1.45%            |              |       | 75.17%                    |              |       |

Adjusted p-values were calculated by multiplying the original p-value by the number of accessory elements tested (n=6).

PEN=penicillin; TET=tetracycline; CIP=ciprofloxacin; CRO=ceftriaxone; CFX=cefixime; AZI=azithromycin; S=susceptible; I= intermediate; R=resistant

\*p<0.05; \*\*p<0.01; \*\*\*p<0.001; \*\*\*\*p<0.0001

significantly more prevalent among susceptible isolates

significantly more prevalent among resistant isolates

Table S5. Significance of associations between accessory genes and AMR.

| Locus                 | NEIS0364             |             |       | NEIS0365             |             |       | NEIS0486              |             |       | NEIS0524           |             |       | NEIS0594             |             |       | NEIS0840                  |             |       |
|-----------------------|----------------------|-------------|-------|----------------------|-------------|-------|-----------------------|-------------|-------|--------------------|-------------|-------|----------------------|-------------|-------|---------------------------|-------------|-------|
| Functional annotation | Hypothetical protein |             |       | Hypothetical protein |             |       | Alcohol dehydrogenase |             |       | Putative peptidase |             |       | Hypothetical protein |             |       | (Putative) phage associat |             |       |
|                       | prevalence           | adj.p-value | sign. | prevalence           | adj.p-value | sign. | prevalence            | adj.p-value | sign. | prevalence         | adj.p-value | sign. | prevalence           | adj.p-value | sign. | prevalence                | adj.p-value | sign. |
| <b>PEN S</b>          | 31.62%               | 3.42E-45    | ****  | 30.77%               | 3.74E-47    | ****  | 47.01%                | 8.42E-09    | ****  | 47.86%             | 1.76E-08    | ****  | 8.55%                | 6.83E-72    | ****  | 0.85%                     | 0.9594      |       |
| <b>PEN I</b>          | 79.27%               |             |       | 79.01%               |             |       | 21.52%                |             |       | 77.11%             |             |       | 43.25%               |             |       | 1.64%                     |             |       |
| <b>PEN R</b>          | 90.50%               |             |       | 90.69%               |             |       | 28.40%                |             |       | 74.49%             |             |       | 13.59%               |             |       | 0.47%                     |             |       |
| <b>TET S</b>          | 59.82%               | 2.15E-69    | ****  | 59.95%               | 1.72E-68    | ****  | 39.15%                | 6.20E-23    | ****  | 68.09%             | 1.26E-07    | ****  | 40.31%               | 2.56E-06    | ****  | 1.55%                     | 1           |       |
| <b>TET R</b>          | 90.15%               |             |       | 90.11%               |             |       | 19.88%                |             |       | 79.14%             |             |       | 29.35%               |             |       | 0.98%                     |             |       |
| <b>CIP S</b>          | 63.11%               | 1.18E-173   | ****  | 62.77%               | 5.23E-165   | ****  | 29.74%                | 2.64E-11    | ****  | 73.69%             | 1           |       | 44.57%               | 2.57E-49    | ****  | 2.19%                     | 1.44E-08    | ****  |
| <b>CIP R</b>          | 95.60%               |             |       | 94.91%               |             |       | 20.25%                |             |       | 75.60%             |             |       | 23.23%               |             |       | 0.22%                     |             |       |
| <b>CRO S</b>          | 81.72%               | 1           |       | 81.12%               | 1           |       | 22.62%                | 1           |       | 74.53%             | 1           |       | 35.09%               | 1           |       | 1.13%                     | 1           |       |
| <b>CRO R</b>          | 95.45%               |             |       | 90.91%               |             |       | 22.73%                |             |       | 86.36%             |             |       | 22.73%               |             |       | 0.00%                     |             |       |
| <b>CFX S</b>          | 79.57%               | 2.43E-28    | ****  | 79.17%               | 4.63E-21    | ****  | 26.30%                | 7.13E-41    | ****  | 76.72%             | 4.87E-16    | ****  | 34.37%               | 0.0037      | **    | 1.17%                     | 1           |       |
| <b>CFX R</b>          | 97.55%               |             |       | 95.51%               |             |       | 2.65%                 |             |       | 92.24%             |             |       | 25.31%               |             |       | 0.20%                     |             |       |
| <b>AZI S</b>          | 79.14%               | 1.17E-37    | ****  | 78.74%               | 3.99E-39    | ****  | 26.87%                | 7.76E-44    | ****  | 74.15%             | 4.06E-16    | ****  | 30.65%               | 9.28E-19    | ****  | 1.04%                     | 1           |       |
| <b>AZI R</b>          | 95.77%               |             |       | 95.77%               |             |       | 6.68%                 |             |       | 87.19%             |             |       | 47.44%               |             |       | 1.00%                     |             |       |

Adjusted p-values were calculated by multiplying the original p-value by the number of genes tested (n=78)

\*p<0.05; \*\*p<0.01; \*\*\*p<0.001; \*\*\*\*p<0.0001

significantly more prevalent among susceptible isolates  
significantly more prevalent among resistant isolates

| Locus                | NEIS0953                   |             |       | NEIS0955         |             |       | NEIS1089             |             |       | NEIS1193          |             |       | NEIS1194          |             |       | NEIS1311          |             |       |
|----------------------|----------------------------|-------------|-------|------------------|-------------|-------|----------------------|-------------|-------|-------------------|-------------|-------|-------------------|-------------|-------|-------------------|-------------|-------|
| Funtional annotation | (Putative) phage associate |             |       | Nf4 phage island |             |       | Hypothetical protein |             |       | Methyltransferase |             |       | Methyltransferase |             |       | Methyltransferase |             |       |
|                      | prevalence                 | adj.p-value | sign. | prevalence       | adj.p-value | sign. | prevalence           | adj.p-value | sign. | prevalence        | adj.p-value | sign. | prevalence        | adj.p-value | sign. | prevalence        | adj.p-value | sign. |
| <b>PEN S</b>         | 15.38%                     | 1.05E-05    | ****  | 82.91%           | 0.00081     | ***   | 22.22%               | 0.44538     | **    | 83.76%            | 2.85E-06    | ****  | 83.76%            | 5.02E-07    | ****  | 54.70%            | 8.74E-52    | ****  |
| <b>PEN I</b>         | 19.67%                     |             |       | 94.30%           |             |       | 22.05%               |             |       | 90.77%            |             |       | 88.92%            |             |       | 79.80%            |             |       |
| <b>PEN R</b>         | 11.82%                     |             |       | 95.44%           |             |       | 27.28%               |             |       | 95.53%            |             |       | 94.79%            |             |       | 96.28%            |             |       |
| <b>TET S</b>         | 21.71%                     | 1.05E-03    | **    | 90.70%           | 7.75E-05    | ****  | 25.06%               | 1           |       | 91.73%            | 1           |       | 90.96%            | 1           |       | 56.20%            | 2.00E-132   | ****  |
| <b>TET R</b>         | 14.75%                     |             |       | 95.71%           |             |       | 23.15%               |             |       | 93.14%            |             |       | 92.49%            |             |       | 95.47%            |             |       |
| <b>CIP S</b>         | 21.78%                     | 3.85E-06    | ****  | 94.47%           | 4.05E-05    | ****  | 20.07%               | 1.93E-08    | ****  | 86.56%            | 4.93E-58    | ****  | 85.22%            | 1.88E-38    | ****  | 68.16%            | 2.65E-175   | ****  |
| <b>CIP R</b>         | 15.37%                     |             |       | 90.46%           |             |       | 28.24%               |             |       | 98.58%            |             |       | 96.42%            |             |       | 97.80%            |             |       |
| <b>CRO S</b>         | 17.50%                     | 1           |       | 91.02%           | 1           |       | 23.09%               | 1           |       | 93.26%            | 1           |       | 91.31%            | 1           |       | 84.57%            | 1           |       |
| <b>CRO R</b>         | 4.55%                      |             |       | 95.45%           |             |       | 4.55%                |             |       | 100.00%           |             |       | 100.00%           |             |       | 100.00%           |             |       |
| <b>CFX S</b>         | 16.38%                     | 3.51E-06    | ****  | 93.46%           | 0.19578     |       | 26.40%               | 2.86E-52    | ****  | 93.03%            | 2.64E-10    | ****  | 91.41%            | 1.26E-10    | ****  | 82.94%            | 1.40E-29    | ****  |
| <b>CFX R</b>         | 7.55%                      |             |       | 89.59%           |             |       | 0.82%                |             |       | 99.59%            |             |       | 98.98%            |             |       | 99.18%            |             |       |
| <b>AZI S</b>         | 17.23%                     | 1           |       | 90.30%           | 2.91E-16    | ****  | 27.29%               | 2.64E-43    | ****  | 92.59%            | 7.37E-03    | **    | 90.61%            | 0.024492    | *     | 83.28%            | 7.88E-22    | ****  |
| <b>AZI R</b>         | 13.81%                     |             |       | 98.11%           |             |       | 7.02%                |             |       | 96.10%            |             |       | 94.32%            |             |       | 95.21%            |             |       |

| Locus                 | NEIS1667         |             |       | NEIS2486             |             |       | NEIS2582             |             |       | NEIS2615                   |             |       | NEIS2616                   |             |       | NEIS2618                   |             |       |
|-----------------------|------------------|-------------|-------|----------------------|-------------|-------|----------------------|-------------|-------|----------------------------|-------------|-------|----------------------------|-------------|-------|----------------------------|-------------|-------|
| Functional annotation | Nf4 phage island |             |       | Hypothetical protein |             |       | Hypothetical protein |             |       | (Putative) phage associate |             |       | (Putative) phage associate |             |       | (Putative) phage associate |             |       |
|                       | prevalence       | adj.p-value | sign. | prevalence           | adj.p-value | sign. | prevalence           | adj.p-value | sign. | prevalence                 | adj.p-value | sign. | prevalence                 | adj.p-value | sign. | prevalence                 | adj.p-value | sign. |
| <b>PEN S</b>          | 26.50%           | 2.11E-05    | ****  | 94.02%               | 0.01521     | ***   | 67.52%               | 1.25E-44    | ****  | 41.03%                     | 4.06E-07    | ****  | 78.63%                     | 0.0003      | ***   | 72.65%                     | 2.74E-09    | ****  |
| <b>PEN I</b>          | 10.13%           |             |       | 92.67%               |             |       | 19.51%               |             |       | 66.35%                     |             |       | 81.65%                     |             |       | 61.60%                     |             |       |
| <b>PEN R</b>          | 8.29%            |             |       | 88.27%               |             |       | 9.03%                |             |       | 70.11%                     |             |       | 88.18%                     |             |       | 50.09%                     |             |       |
| <b>TET S</b>          | 15.37%           | 3.68E-06    | ****  | 93.15%               | 1           |       | 38.50%               | 1.34E-64    | ****  | 53.75%                     | 8.27E-16    | ****  | 72.09%                     | 6.97E-21    | ****  | 61.11%                     | 1           |       |
| <b>TET R</b>          | 8.21%            |             |       | 91.46%               |             |       | 9.61%                |             |       | 70.98%                     |             |       | 87.96%                     |             |       | 57.16%                     |             |       |
| <b>CIP S</b>          | 6.72%            | 9.59E-29    | ****  | 94.76%               | 8.11E-14    | ****  | 34.60%               | 2.91E-173   | ****  | 65.68%                     | 0.12402     |       | 85.41%                     | 5.71E-12    | ****  | 63.78%                     | 3.14E-08    | ****  |
| <b>CIP R</b>          | 18.01%           |             |       | 88.00%               |             |       | 3.41%                |             |       | 61.05%                     |             |       | 76.55%                     |             |       | 54.49%                     |             |       |
| <b>CRO S</b>          | 14.56%           | 1           |       | 91.78%               | 1           |       | 16.52%               | 1           |       | 63.21%                     | 1           |       | 79.66%                     | 1           |       | 59.14%                     | 1           |       |
| <b>CRO R</b>          | 9.09%            |             |       | 90.91%               |             |       | 4.55%                |             |       | 63.64%                     |             |       | 81.82%                     |             |       | 40.91%                     |             |       |
| <b>CFX S</b>          | 12.69%           | 1           |       | 91.36%               | 1.02E-09    | ****  | 18.91%               | 6.87E-34    | ****  | 65.48%                     | 0.8268      |       | 81.54%                     | 0.47        |       | 63.76%                     | 1           |       |
| <b>CFX R</b>          | 16.53%           |             |       | 98.78%               |             |       | 0.82%                |             |       | 59.59%                     |             |       | 86.53%                     |             |       | 62.04%                     |             |       |
| <b>AZI S</b>          | 15.96%           | 5.14E-29    | ****  | 90.36%               | 2.96E-07    | ****  | 19.42%               | 1.01E-35    | ****  | 57.88%                     | 1.64E-33    | ****  | 76.06%                     | 3.71E-44    | ****  | 58.11%                     | 1           |       |
| <b>AZI R</b>          | 3.01%            |             |       | 96.10%               |             |       | 3.79%                |             |       | 79.62%                     |             |       | 95.10%                     |             |       | 59.91%                     |             |       |

| Locus                 | NEIS2619                   |             |       | NEIS2621                   |             |       | NEIS2640                   |             |       | NEIS2643                   |             |       | NEIS2646                |             |       | NEIS2647                |             |       |
|-----------------------|----------------------------|-------------|-------|----------------------------|-------------|-------|----------------------------|-------------|-------|----------------------------|-------------|-------|-------------------------|-------------|-------|-------------------------|-------------|-------|
| Functional annotation | (Putative) phage associate |             |       | (Putative) phage associate |             |       | (Putative) phage associate |             |       | (Putative) phage associate |             |       | TonB dependent receptor |             |       | TonB dependent receptor |             |       |
|                       | prevalence                 | adj.p-value | sign. | prevalence                 | adj.p-value | sign. | prevalence                 | adj.p-value | sign. | prevalence                 | adj.p-value | sign. | prevalence              | adj.p-value | sign. | prevalence              | adj.p-value | sign. |
| <b>PEN S</b>          | 64.10%                     | 8.27E-09    | ****  | 13.68%                     | 1.63E-10    | ****  | 32.48%                     | 0.029       | *     | 75.21%                     | 0.11388     |       | 7.69%                   | 0.00874     | **    | 8.55%                   | 7.02E-04    | ***   |
| <b>PEN I</b>          | 61.87%                     |             |       | 3.06%                      |             |       | 23.26%                     |             |       | 67.30%                     |             |       | 1.95%                   |             |       | 2.27%                   |             |       |
| <b>PEN R</b>          | 49.35%                     |             |       | 0.65%                      |             |       | 18.72%                     |             |       | 73.18%                     |             |       | 3.91%                   |             |       | 4.93%                   |             |       |
| <b>TET S</b>          | 63.82%                     | 9.75E-04    | ****  | 4.91%                      | 5.62E-04    | ****  | 31.52%                     | 2.07E-10    | ****  | 65.37%                     | 0.07605     |       | 5.81%                   | 1.19E-05    | ****  | 6.20%                   | 1.73E-04    | ***   |
| <b>TET R</b>          | 54.74%                     |             |       | 1.73%                      |             |       | 18.95%                     |             |       | 71.77%                     |             |       | 1.87%                   |             |       | 2.38%                   |             |       |
| <b>CIP S</b>          | 61.30%                     | 0.01326     | *     | 4.91%                      | 2.54E-10    | ****  | 22.64%                     | 1           |       | 67.21%                     | 1.39E-06    | ****  | 4.77%                   | 7.62E-08    | ****  | 5.43%                   | 3.09E-08    | ****  |
| <b>CIP R</b>          | 55.70%                     |             |       | 1.34%                      |             |       | 22.71%                     |             |       | 74.91%                     |             |       | 1.60%                   |             |       | 1.94%                   |             |       |
| <b>CRO S</b>          | 58.01%                     | 1           |       | 2.73%                      | 1           |       | 22.27%                     | 1           |       | 71.12%                     | 0.0975      |       | 2.92%                   | 1           |       | 3.20%                   | 1           |       |
| <b>CRO R</b>          | 36.36%                     |             |       | 9.09%                      |             |       | 13.64%                     |             |       | 100.00%                    |             |       | 4.55%                   |             |       | 13.64%                  |             |       |
| <b>CFX S</b>          | 62.51%                     | 1.47E-32    | ****  | 3.05%                      | 0.16        |       | 22.15%                     | 0.58        |       | 74.10%                     | 0.19        |       | 3.25%                   | 0.09        |       | 3.62%                   | 0.24882     |       |
| <b>CFX R</b>          | 33.47%                     |             |       | 0.82%                      |             |       | 16.94%                     |             |       | 80.41%                     |             |       | 0.82%                   |             |       | 1.22%                   |             |       |
| <b>AZI S</b>          | 57.68%                     | 4.27E-05    | ****  | 3.02%                      | 1           |       | 26.11%                     | 1.24E-17    | ****  | 70.45%                     | 0.43602     |       | 3.47%                   | 3.50E-08    | ****  | 3.95%                   | 5.79E-10    | ****  |
| <b>AZI R</b>          | 48.33%                     |             |       | 2.12%                      |             |       | 12.47%                     |             |       | 75.17%                     |             |       | 0.22%                   |             |       | 0.22%                   |             |       |

| Locus                 | NEIS2666             |             |       | NEIS2691          |             |       | NEIS2692          |             |       | NEIS2693         |             |       | NEIS2705             |             |       | NEIS2713                   |             |       |
|-----------------------|----------------------|-------------|-------|-------------------|-------------|-------|-------------------|-------------|-------|------------------|-------------|-------|----------------------|-------------|-------|----------------------------|-------------|-------|
| Functional annotation | Hypothetical protein |             |       | Methyltransferase |             |       | Methyltransferase |             |       | Nf4 phage island |             |       | Hypothetical protein |             |       | (Putative) phage associate |             |       |
|                       | prevalence           | adj.p-value | sign. | prevalence        | adj.p-value | sign. | prevalence        | adj.p-value | sign. | prevalence       | adj.p-value | sign. | prevalence           | adj.p-value | sign. | prevalence                 | adj.p-value | sign. |
| <b>PEN S</b>          | 56.41%               | 8.89E-19    | ****  | 43.59%            | 1.90E-45    | ****  | 43.59%            | 1.16E-44    | ****  | 88.89%           | 2.64E-19    | ****  | 70.09%               | 9.91E-59    | ****  | 86.32%                     | 2.00E-79    | ****  |
| <b>PEN I</b>          | 84.92%               |             |       | 91.61%            |             |       | 91.56%            |             |       | 89.19%           |             |       | 60.34%               |             |       | 25.63%                     |             |       |
| <b>PEN R</b>          | 91.34%               |             |       | 96.28%            |             |       | 96.09%            |             |       | 75.61%           |             |       | 30.17%               |             |       | 8.66%                      |             |       |
| <b>TET S</b>          | 79.33%               | 8.35E-11    | ****  | 81.78%            | 9.98E-26    | ****  | 81.78%            | 2.60E-25    | ****  | 94.06%           | 9.75E-20    | ****  | 58.01%               | 1.79E-06    | ****  | 50.52%                     | 1.62E-106   | ****  |
| <b>TET R</b>          | 89.78%               |             |       | 95.29%            |             |       | 95.19%            |             |       | 80.45%           |             |       | 46.24%               |             |       | 10.64%                     |             |       |
| <b>CIP S</b>          | 75.93%               | 3.77E-97    | ****  | 80.89%            | 9.98E-104   | ****  | 80.79%            | 1.93E-102   | ****  | 91.37%           | 5.47E-42    | ****  | 72.40%               | 6.60E-202   | ****  | 42.14%                     | 4.14E-207   | ****  |
| <b>CIP R</b>          | 96.63%               |             |       | 98.92%            |             |       | 98.83%            |             |       | 76.08%           |             |       | 27.29%               |             |       | 4.92%                      |             |       |
| <b>CRO S</b>          | 88.17%               | 1           |       | 91.04%            | 1           |       | 90.96%            | 1           |       | 84.33%           | 1           |       | 46.41%               | 0.025974    | *     | 20.83%                     | 1           |       |
| <b>CRO R</b>          | 95.45%               |             |       | 100.00%           |             |       | 100.00%           |             |       | 77.27%           |             |       | 9.09%                |             |       | 4.55%                      |             |       |
| <b>CFX S</b>          | 87.04%               | 2.93E-26    | ****  | 89.91%            | 2.02E-14    | ****  | 89.84%            | 1.27E-14    | ****  | 86.11%           | 7.80E-24    | ****  | 50.20%               | 9.67E-64    | ****  | 22.85%                     | 3.99E-38    | ****  |
| <b>CFX R</b>          | 100.00%              |             |       | 99.18%            |             |       | 99.18%            |             |       | 65.92%           |             |       | 11.84%               |             |       | 1.63%                      |             |       |
| <b>AZI S</b>          | 85.93%               | 6.19E-16    | ****  | 89.26%            | 5.12E-29    | ****  | 89.23%            | 4.59E-28    | ****  | 83.03%           | 1           |       | 44.88%               | 8.58E-05    | ****  | 24.08%                     | 1.30E-53    | ****  |
| <b>AZI R</b>          | 95.55%               |             |       | 99.33%            |             |       | 99.22%            |             |       | 81.29%           |             |       | 54.01%               |             |       | 3.56%                      |             |       |

| Locus                 | NEIS2714                    |             |       | NEIS2718                    |             |       | NEIS2744                |             |       | NEIS2859             |             |       | NEIS3177       |             |       | NEIS3178             |             |       |
|-----------------------|-----------------------------|-------------|-------|-----------------------------|-------------|-------|-------------------------|-------------|-------|----------------------|-------------|-------|----------------|-------------|-------|----------------------|-------------|-------|
| Functional annotation | (Putative) phage associated |             |       | (Putative) phage associated |             |       | TonB dependent receptor |             |       | Hypothetical protein |             |       | Phage island X |             |       | Hypothetical protein |             |       |
|                       | prevalence                  | adj.p-value | sign. | prevalence                  | adj.p-value | sign. | prevalence              | adj.p-value | sign. | prevalence           | adj.p-value | sign. | prevalence     | adj.p-value | sign. | prevalence           | adj.p-value | sign. |
| <b>PEN S</b>          | 64.96%                      | 4.08E-04    | ***   | 71.79%                      | 1.15E-05    | ****  | 88.89%                  | 1           |       | 23.08%               | 1           |       | 6.84%          | 5.82E-07    | ****  | 21.37%               | 1.29E-21    | ****  |
| <b>PEN I</b>          | 56.86%                      |             |       | 59.28%                      |             |       | 94.78%                  |             |       | 16.03%               |             |       | 0.53%          |             |       | 43.25%               |             |       |
| <b>PEN R</b>          | 65.83%                      |             |       | 68.90%                      |             |       | 93.11%                  |             |       | 14.71%               |             |       | 0.00%          |             |       | 25.79%               |             |       |
| <b>TET S</b>          | 61.24%                      | 1           |       | 55.94%                      | 3.27E-05    | ****  | 90.57%                  | 3.66E-04    | ***   | 14.73%               | 1           |       | 1.55%          | 1.77E-03    | **    | 30.88%               | 5.82E-03    | **    |
| <b>TET R</b>          | 59.26%                      |             |       | 66.26%                      |             |       | 95.33%                  |             |       | 16.43%               |             |       | 0.14%          |             |       | 38.92%               |             |       |
| <b>CIP S</b>          | 58.77%                      | 1           |       | 60.92%                      | 4.24E-11    | ****  | 92.61%                  | 1.61E-05    | ****  | 19.11%               | 1           |       | 1.43%          | 1.43E-08    | ****  | 40.42%               | 2.70E-07    | ****  |
| <b>CIP R</b>          | 59.33%                      |             |       | 71.20%                      |             |       | 96.20%                  |             |       | 19.17%               |             |       | 0.00%          |             |       | 31.87%               |             |       |
| <b>CRO S</b>          | 58.34%                      | 1           |       | 65.69%                      | 0.9282      |       | 94.99%                  | 1           |       | 18.69%               | 1           |       | 0.66%          | 1           |       | 37.96%               | 1           |       |
| <b>CRO R</b>          | 68.18%                      |             |       | 90.91%                      |             |       | 86.36%                  |             |       | 9.09%                |             |       | 0.00%          |             |       | 22.73%               |             |       |
| <b>CFX S</b>          | 56.64%                      | 1.71E-12    | ****  | 68.91%                      | 1           |       | 94.23%                  | 0.2262      |       | 24.08%               | 9.75E-12    | ****  | 0.72%          | 1           |       | 40.83%               | 3.01E-03    | **    |
| <b>CFX R</b>          | 74.29%                      |             |       | 73.27%                      |             |       | 97.35%                  |             |       | 10.20%               |             |       | 0.00%          |             |       | 31.22%               |             |       |
| <b>AZI S</b>          | 59.37%                      | 0.21528     |       | 66.20%                      | 1           |       | 94.02%                  | 0.0194      | *     | 20.98%               | 3.89E-06    | ****  | 0.76%          | 0.25194     |       | 32.08%               | 4.00E-34    | ****  |
| <b>AZI R</b>          | 53.79%                      |             |       | 70.27%                      |             |       | 96.99%                  |             |       | 13.14%               |             |       | 0.00%          |             |       | 55.01%               |             |       |

| Locus                 | NEIS3179             |             |       | NEIS3180             |             |       | NEIS3181                   |             |       | NEIS3182          |             |       | NEIS3183             |             |       | NEIS3184          |             |       |
|-----------------------|----------------------|-------------|-------|----------------------|-------------|-------|----------------------------|-------------|-------|-------------------|-------------|-------|----------------------|-------------|-------|-------------------|-------------|-------|
| Functional annotation | Hypothetical protein |             |       | Hypothetical protein |             |       | (Putative) phage associate |             |       | Methyltransferase |             |       | Hypothetical protein |             |       | DNA transcription |             |       |
|                       | prevalence           | adj.p-value | sign. | prevalence           | adj.p-value | sign. | prevalence                 | adj.p-value | sign. | prevalence        | adj.p-value | sign. | prevalence           | adj.p-value | sign. | prevalence        | adj.p-value | sign. |
| <b>PEN S</b>          | 98.29%               | 2.29E-03    | ****  | 92.31%               | 6.04E-81    | ****  | 86.32%                     | 0.01092     | *     | 73.50%            | 3.12E-04    | ***   | 93.16%               | 1           |       | 37.61%            | 1.65E-16    | ****  |
| <b>PEN I</b>          | 93.57%               |             |       | 68.62%               |             |       | 83.23%                     |             |       | 57.44%            |             |       | 96.47%               |             |       | 67.88%            |             |       |
| <b>PEN R</b>          | 89.76%               |             |       | 95.81%               |             |       | 88.83%                     |             |       | 51.68%            |             |       | 96.65%               |             |       | 76.82%            |             |       |
| <b>TET S</b>          | 94.32%               | 1           |       | 77.65%               | 1           |       | 74.03%                     | 1.61E-19    | ****  | 53.10%            | 1           |       | 96.51%               | 1           |       | 57.11%            | 3.13E-21    | ****  |
| <b>TET R</b>          | 92.11%               |             |       | 78.81%               |             |       | 88.94%                     |             |       | 56.00%            |             |       | 96.78%               |             |       | 76.34%            |             |       |
| <b>CIP S</b>          | 93.23%               | 1           |       | 63.54%               | 4.30E-171   | ****  | 86.08%                     | 0.00858     | **    | 65.54%            | 7.39E-33    | ****  | 93.85%               | 1           |       | 61.49%            | 6.48E-20    | ****  |
| <b>CIP R</b>          | 91.54%               |             |       | 95.64%               |             |       | 89.90%                     |             |       | 47.19%            |             |       | 95.21%               |             |       | 74.91%            |             |       |
| <b>CRO S</b>          | 91.68%               | 1           |       | 80.85%               | 1           |       | 88.68%                     | 1           |       | 58.05%            | 1           |       | 93.22%               | 1           |       | 70.11%            | 1           |       |
| <b>CRO R</b>          | 100.00%              |             |       | 90.91%               |             |       | 90.91%                     |             |       | 81.82%            |             |       | 100.00%              |             |       | 68.18%            |             |       |
| <b>CFX S</b>          | 95.05%               | 1           |       | 78.30%               | 5.39E-39    | ****  | 86.84%                     | 1.77E-06    | ****  | 58.92%            | 1.14E-07    | ****  | 96.08%               | 1           |       | 68.73%            | 3.63E-14    | ****  |
| <b>CFX R</b>          | 92.65%               |             |       | 98.98%               |             |       | 94.90%                     |             |       | 72.86%            |             |       | 94.29%               |             |       | 85.51%            |             |       |
| <b>AZI S</b>          | 90.98%               | 1           |       | 84.47%               | 4.42E-54    | ****  | 86.44%                     | 5.58E-05    | ****  | 50.21%            | 1.76E-50    | ****  | 92.08%               | 1.32E-10    | ****  | 68.14%            | 5.35E-15    | ****  |
| <b>AZI R</b>          | 92.65%               |             |       | 59.13%               |             |       | 92.32%                     |             |       | 77.73%            |             |       | 98.00%               |             |       | 81.85%            |             |       |



| Locus                 | NEIS3186       |             |       | NEIS3188               |             |       | NEIS3189              |             |       | NEIS3193             |             |       | NEIS3195       |             |       | NEIS3196             |             |       |
|-----------------------|----------------|-------------|-------|------------------------|-------------|-------|-----------------------|-------------|-------|----------------------|-------------|-------|----------------|-------------|-------|----------------------|-------------|-------|
| Functional annotation | Phage island X |             |       | Toxin-antitoxin system |             |       | TspB virulence factor |             |       | Hypothetical protein |             |       | Phage island X |             |       | Hypothetical protein |             |       |
|                       | prevalence     | adj.p-value | sign. | prevalence             | adj.p-value | sign. | prevalence            | adj.p-value | sign. | prevalence           | adj.p-value | sign. | prevalence     | adj.p-value | sign. | prevalence           | adj.p-value | sign. |
| <b>PEN S</b>          | 5.98%          | 3.88E-06    | ****  | 18.80%                 | 9.20E-119   | ****  | 98.29%                | 0.012168    | *     | 86.32%               | 2.92E-43    | ****  | 6.84%          | 5.82E-07    | ****  | 86.32%               | 6.06E-06    | ****  |
| <b>PEN I</b>          | 0.42%          |             |       | 24.74%                 |             |       | 96.94%                |             |       | 89.40%               |             |       | 0.53%          |             |       | 89.87%               |             |       |
| <b>PEN R</b>          | 0.00%          |             |       | 67.50%                 |             |       | 93.85%                |             |       | 67.97%               |             |       | 0.00%          |             |       | 95.25%               |             |       |
| <b>TET S</b>          | 1.29%          | 4.95E-03    | **    | 16.93%                 | 3.88E-54    | ****  | 98.84%                | 1.47E-05    | ****  | 86.56%               | 4.30E-03    | **    | 1.55%          | 1.77E-03    | **    | 88.89%               | 0.019734    | *     |
| <b>TET R</b>          | 0.09%          |             |       | 48.02%                 |             |       | 94.91%                |             |       | 80.12%               |             |       | 0.14%          |             |       | 93.19%               |             |       |
| <b>CIP S</b>          | 1.29%          | 1.36E-07    | ****  | 9.72%                  | 1.22E-285   | ****  | 96.04%                | 3.36E-05    | ****  | 92.04%               | 6.31E-75    | ****  | 1.43%          | 1.43E-08    | ****  | 87.89%               | 3.28E-18    | ****  |
| <b>CIP R</b>          | 0.00%          |             |       | 59.93%                 |             |       | 92.49%                |             |       | 70.68%               |             |       | 0.00%          |             |       | 95.42%               |             |       |
| <b>CRO S</b>          | 0.62%          | 1           |       | 35.62%                 | 0.011076    | *     | 94.04%                | 1           |       | 82.21%               | 1           |       | 0.66%          | 1           |       | 92.67%               | 1           |       |
| <b>CRO R</b>          | 0.00%          |             |       | 77.27%                 |             |       | 95.45%                |             |       | 95.45%               |             |       | 0.00%          |             |       | 86.36%               |             |       |
| <b>CFX S</b>          | 0.65%          | 1           |       | 32.69%                 | 1.44E-59    | ****  | 96.08%                | 7.43E-09    | ****  | 80.67%               | 1.54E-33    | ****  | 0.72%          | 1           |       | 92.66%               | 1           |       |
| <b>CFX R</b>          | 0.00%          |             |       | 71.63%                 |             |       | 88.57%                |             |       | 98.98%               |             |       | 0.00%          |             |       | 91.22%               |             |       |
| <b>AZI S</b>          | 0.68%          | 0.65442     |       | 36.20%                 | 4.20E-04    | ****  | 93.71%                | 1           |       | 78.29%               | 7.53E-36    | ****  | 0.76%          | 0.25194     |       | 91.65%               | 2.64E-08    | ****  |
| <b>AZI R</b>          | 0.00%          |             |       | 44.54%                 |             |       | 94.21%                |             |       | 94.99%               |             |       | 0.00%          |             |       | 97.22%               |             |       |

| Locus                 | NEIS3197             |             |       | NEIS3198             |             |       | NEIS3200             |             |       | NEIS3202        |             |       | NEIS3203                   |             |       | NEIS3204       |             |       |
|-----------------------|----------------------|-------------|-------|----------------------|-------------|-------|----------------------|-------------|-------|-----------------|-------------|-------|----------------------------|-------------|-------|----------------|-------------|-------|
| Functional annotation | Hypothetical protein |             |       | Hypothetical protein |             |       | Hypothetical protein |             |       | DNA replication |             |       | (Putative) phage associate |             |       | Phage island X |             |       |
|                       | prevalence           | adj.p-value | sign. | prevalence           | adj.p-value | sign. | prevalence           | adj.p-value | sign. | prevalence      | adj.p-value | sign. | prevalence                 | adj.p-value | sign. | prevalence     | adj.p-value | sign. |
| <b>PEN S</b>          | 85.47%               | 1.45E-18    | ****  | 81.20%               | 1           |       | 55.56%               | 9.59E-07    | ****  | 3.42%           | 4.56E-03    | **    | 2.56%                      | 2.66E-03    | **    | 7.69%          | 4.36E-08    | ****  |
| <b>PEN I</b>          | 96.99%               |             |       | 86.39%               |             |       | 29.85%               |             |       | 5.49%           |             |       | 6.43%                      |             |       | 0.53%          |             |       |
| <b>PEN R</b>          | 88.73%               |             |       | 88.45%               |             |       | 27.47%               |             |       | 2.23%           |             |       | 2.89%                      |             |       | 0.00%          |             |       |
| <b>TET S</b>          | 97.03%               | 2.04E-04    | ***   | 88.37%               | 1           |       | 45.48%               | 4.21E-27    | ****  | 9.30%           | 3.61E-10    | ****  | 10.34%                     | 1.44E-09    | ****  | 1.68%          | 5.69E-04    | ***   |
| <b>TET R</b>          | 92.44%               |             |       | 88.61%               |             |       | 23.57%               |             |       | 2.80%           |             |       | 3.55%                      |             |       | 0.14%          |             |       |
| <b>CIP S</b>          | 97.62%               | 9.59E-21    | ****  | 75.50%               | 8.66E-13    | ****  | 37.23%               | 5.80E-20    | ****  | 3.72%           | 0.60762     |       | 3.96%                      | 1           |       | 1.48%          | 6.72E-09    | ****  |
| <b>CIP R</b>          | 90.89%               |             |       | 84.76%               |             |       | 23.92%               |             |       | 2.33%           |             |       | 3.15%                      |             |       | 0.00%          |             |       |
| <b>CRO S</b>          | 93.98%               | 1           |       | 78.37%               | 1           |       | 31.37%               | 1           |       | 2.71%           | 1           |       | 3.20%                      | 1           |       | 0.68%          | 1           |       |
| <b>CRO R</b>          | 100.00%              |             |       | 81.82%               |             |       | 22.73%               |             |       | 0.00%           |             |       | 0.00%                      |             |       | 0.00%          |             |       |
| <b>CFX S</b>          | 92.48%               | 3.03E-14    | ****  | 83.02%               | 1           |       | 32.17%               | 3.93E-10    | ****  | 3.27%           | 4.70E-04    | ***   | 3.87%                      | 4.24E-05    | ****  | 0.75%          | 1           |       |
| <b>CFX R</b>          | 100.00%              |             |       | 82.45%               |             |       | 17.55%               |             |       | 0.20%           |             |       | 0.20%                      |             |       | 0.00%          |             |       |
| <b>AZI S</b>          | 93.40%               | 1.16E-09    | ****  | 80.32%               | 2.11E-03    | **    | 32.03%               | 5.59E-13    | ****  | 3.27%           | 1*          |       | 3.95%                      | 0.08346     |       | 0.79%          | 0.25818     |       |
| <b>AZI R</b>          | 98.55%               |             |       | 86.30%               |             |       | 19.15%               |             |       | 1.78%           |             |       | 1.78%                      |             |       | 0.00%          |             |       |

| Locus                 | NEIS3205                    |             |       | NEIS3206             |             |       | NEIS3207       |             |       | NEIS3208             |             |       | NEIS3209             |             |       | NEIS3210             |             |       |
|-----------------------|-----------------------------|-------------|-------|----------------------|-------------|-------|----------------|-------------|-------|----------------------|-------------|-------|----------------------|-------------|-------|----------------------|-------------|-------|
| Functional annotation | (Putative) phage associated |             |       | Hypothetical protein |             |       | Phage island X |             |       | Hypothetical protein |             |       | Hypothetical protein |             |       | Hypothetical protein |             |       |
|                       | prevalence                  | adj.p-value | sign. | prevalence           | adj.p-value | sign. | prevalence     | adj.p-value | sign. | prevalence           | adj.p-value | sign. | prevalence           | adj.p-value | sign. | prevalence           | adj.p-value | sign. |
| <b>PEN S</b>          | 3.42%                       | 1.37E-05    | ****  | 7.69%                | 1.02E-06    | ****  | 8.55%          | 2.54E-09    | ****  | 64.96%               | 2.94E-03    | **    | 18.80%               | 6.66E-18    | ****  | 57.26%               | 3.07E-13    | ****  |
| <b>PEN I</b>          | 7.01%                       |             |       | 31.28%               |             |       | 0.53%          |             |       | 68.88%               |             |       | 62.39%               |             |       | 28.27%               |             |       |
| <b>PEN R</b>          | 2.51%                       |             |       | 28.68%               |             |       | 0.00%          |             |       | 60.71%               |             |       | 60.24%               |             |       | 21.51%               |             |       |
| <b>TET S</b>          | 11.37%                      | 3.43E-12    | ****  | 36.82%               | 3.81E-04    | ***   | 1.81%          | 1.80E-04    | ***   | 66.28%               | 1           |       | 43.67%               | 1.21E-25    | ****  | 40.44%               | 1.28E-19    | ****  |
| <b>TET R</b>          | 3.55%                       |             |       | 27.90%               |             |       | 0.14%          |             |       | 66.17%               |             |       | 66.17%               |             |       | 22.21%               |             |       |
| <b>CIP S</b>          | 4.67%                       | 0.14118     |       | 26.26%               | 4.34E-05    | ****  | 1.53%          | 3.17E-09    | ****  | 70.97%               | 0.09126     |       | 54.81%               | 1.83E-12    | ****  | 33.51%               | 8.74E-25    | ****  |
| <b>CIP R</b>          | 2.85%                       |             |       | 33.16%               |             |       | 0.00%          |             |       | 66.41%               |             |       | 66.06%               |             |       | 19.34%               |             |       |
| <b>CRO S</b>          | 3.37%                       | 1           |       | 29.05%               | 0.053664    |       | 0.70%          | 1           |       | 67.73%               | 0.8502      |       | 60.17%               | 1           |       | 23.60%               | 1           |       |
| <b>CRO R</b>          | 0.00%                       |             |       | 0.00%                |             |       | 0.00%          |             |       | 40.91%               |             |       | 36.36%               |             |       | 9.09%                |             |       |
| <b>CFX S</b>          | 4.07%                       | 1.12E-05    | ****  | 30.14%               | 1.20E-52    | ****  | 0.77%          | 1           |       | 72.85%               | 1.88E-94    | ****  | 63.66%               | 1.88E-61    | ****  | 26.17%               | 2.11E-38    | ****  |
| <b>CFX R</b>          | 0.20%                       |             |       | 2.24%                |             |       | 0.00%          |             |       | 24.49%               |             |       | 24.08%               |             |       | 3.06%                |             |       |
| <b>AZI S</b>          | 4.14%                       | 0.076752    |       | 34.76%               | 2.09E-44    | ****  | 0.82%          | 0.15834     |       | 66.48%               | 4.60E-04    | ***   | 58.61%               | 5.94E-16    | ****  | 26.73%               | 1.29E-08    | ****  |
| <b>AZI R</b>          | 1.89%                       |             |       | 11.80%               |             |       | 0.00%          |             |       | 74.28%               |             |       | 73.94%               |             |       | 16.70%               |             |       |

| Locus                 | NEIS3211          |             |       | NEIS3213             |             |       | NEIS3214                    |             |       | NEIS3215             |             |       | NEIS3216             |             |       | NEIS3217             |             |       |
|-----------------------|-------------------|-------------|-------|----------------------|-------------|-------|-----------------------------|-------------|-------|----------------------|-------------|-------|----------------------|-------------|-------|----------------------|-------------|-------|
| Functional annotation | DNA transcription |             |       | Hypothetical protein |             |       | (Putative) phage associated |             |       | Hypothetical protein |             |       | Hypothetical protein |             |       | Hypothetical protein |             |       |
|                       | prevalence        | adj.p-value | sign. | prevalence           | adj.p-value | sign. | prevalence                  | adj.p-value | sign. | prevalence           | adj.p-value | sign. | prevalence           | adj.p-value | sign. | prevalence           | adj.p-value | sign. |
| PEN S                 | 13.68%            | 2.25E-31    | ****  | 4.27%                | 6.85E-05    | ****  | 86.32%                      | 5.06E-70    | ****  | 84.62%               | 1.79E-08    | ****  | 18.80%               | 1.63E-20    | ****  | 8.55%                | 2.53E-05    | ****  |
| PEN I                 | 41.19%            |             |       | 2.06%                |             |       | 21.04%                      |             |       | 86.76%               |             |       | 8.54%                |             |       | 1.00%                |             |       |
| PEN R                 | 21.32%            |             |       | 0.19%                |             |       | 9.50%                       |             |       | 94.04%               |             |       | 21.51%               |             |       | 0.56%                |             |       |
| TET S                 | 25.32%            | 1.97E-06    | ****  | 4.26%                | 4.17E-09    | ****  | 39.66%                      | 6.97E-61    | ****  | 86.30%               | 6.68E-04    | ***   | 8.91%                | 3.35E-04    | ***   | 1.68%                | 1           |       |
| TET R                 | 36.21%            |             |       | 0.56%                |             |       | 10.92%                      |             |       | 91.97%               |             |       | 15.40%               |             |       | 0.89%                |             |       |
| CIP S                 | 39.85%            | 1.73E-24    | ****  | 3.57%                | 2.29E-23    | ****  | 36.18%                      | 8.50E-154   | ****  | 84.13%               | 4.98E-21    | ****  | 5.20%                | 2.11E-51    | ****  | 2.24%                | 1.41E-05    | ****  |
| CIP R                 | 24.91%            |             |       | 0.00%                |             |       | 5.31%                       |             |       | 93.39%               |             |       | 20.29%               |             |       | 0.47%                |             |       |
| CRO S                 | 30.98%            | 1           |       | 1.40%                | 1           |       | 18.32%                      | 1           |       | 89.93%               | 1           |       | 13.37%               | 1           |       | 1.15%                | 1           |       |
| CRO R                 | 13.64%            |             |       | 0.00%                |             |       | 0.00%                       |             |       | 81.82%               |             |       | 18.18%               |             |       | 0.00%                |             |       |
| CFX S                 | 33.02%            | 5.23E-24    | ****  | 1.62%                | 0.0702      |       | 20.60%                      | 6.65E-38    | ****  | 90.83%               | 1           |       | 15.11%               | 1.58E-04    | ***   | 1.35%                | 0.2652      |       |
| CFX R                 | 11.43%            |             |       | 0.00%                |             |       | 0.82%                       |             |       | 89.80%               |             |       | 7.55%                |             |       | 0.00%                |             |       |
| AZI S                 | 25.88%            | 3.34E-56    | ****  | 1.86%                | 0.31902     |       | 20.92%                      | 3.19E-45    | ****  | 88.86%               | 9.36E-11    | ****  | 14.77%               | 1.69E-03    | **    | 1.30%                | 4.01E-03    | **    |
| AZI R                 | 54.68%            |             |       | 0.56%                |             |       | 3.12%                       |             |       | 96.10%               |             |       | 9.47%                |             |       | 0.00%                |             |       |

| Locus                 | NEIS3218                   |             |       | NEIS3219             |             |       | NEIS3220          |             |       | NEIS3221                   |             |       | NEIS3222       |             |       | NEIS3223             |             |       |
|-----------------------|----------------------------|-------------|-------|----------------------|-------------|-------|-------------------|-------------|-------|----------------------------|-------------|-------|----------------|-------------|-------|----------------------|-------------|-------|
| Functional annotation | (Putative) phage associate |             |       | Hypothetical protein |             |       | DNA transcription |             |       | (Putative) phage associate |             |       | Phage island X |             |       | Hypothetical protein |             |       |
|                       | prevalence                 | adj.p-value | sign. | prevalence           | adj.p-value | sign. | prevalence        | adj.p-value | sign. | prevalence                 | adj.p-value | sign. | prevalence     | adj.p-value | sign. | prevalence           | adj.p-value | sign. |
| <b>PEN S</b>          | 85.47%                     | 4.79E-18    | ****  | 2.56%                | 1.95E-04    | ***   | 87.18%            | 1           |       | 3.42%                      | 4.13E-05    | ****  | 5.98%          | 7.23E-06    | ****  | 86.32%               | 1.29E-69    | ****  |
| <b>PEN I</b>          | 96.99%                     |             |       | 6.96%                |             |       | 93.09%            |             |       | 7.49%                      |             |       | 0.53%          |             |       | 21.04%               |             |       |
| <b>PEN R</b>          | 88.92%                     |             |       | 2.89%                |             |       | 91.62%            |             |       | 2.98%                      |             |       | 0.00%          |             |       | 9.59%                |             |       |
| <b>TET S</b>          | 97.03%                     | 2.82E-04    | ***   | 11.11%               | 1.01E-10    | ****  | 87.98%            | 2.03E-04    | ***   | 12.14%                     | 1.17E-12    | ****  | 1.42%          | 5.42E-03    | **    | 39.66%               | 1.14E-60    | ****  |
| <b>TET R</b>          | 92.53%                     |             |       | 3.73%                |             |       | 93.56%            |             |       | 3.92%                      |             |       | 0.14%          |             |       | 10.97%               |             |       |
| <b>CIP S</b>          | 97.62%                     | 4.11E-20    | ****  | 4.43%                | 1           |       | 93.57%            | 1           |       | 4.91%                      | 0.44382     |       | 1.38%          | 3.02E-08    | ****  | 36.18%               | 3.92E-153   | ****  |
| <b>CIP R</b>          | 91.02%                     |             |       | 3.15%                |             |       | 93.18%            |             |       | 3.24%                      |             |       | 0.00%          |             |       | 5.35%                |             |       |
| <b>CRO S</b>          | 93.88%                     | 1           |       | 3.41%                | 1           |       | 94.39%            | 1           |       | 3.66%                      | 1           |       | 0.64%          | 1           |       | 18.34%               | 1           |       |
| <b>CRO R</b>          | 100.00%                    |             |       | 0.00%                |             |       | 100.00%           |             |       | 0.00%                      |             |       | 0.00%          |             |       | 0.00%                |             |       |
| <b>CFX S</b>          | 92.46%                     | 1.97E-11    | ****  | 4.12%                | 1.15E-05    | ****  | 93.28%            | 4.40E-07    | ****  | 4.42%                      | 3.44E-06    | ****  | 0.70%          | 1           |       | 20.63%               | 6.40E-38    | ****  |
| <b>CFX R</b>          | 99.59%                     |             |       | 0.20%                |             |       | 98.98%            |             |       | 0.20%                      |             |       | 0.00%          |             |       | 0.82%                |             |       |
| <b>AZI S</b>          | 93.35%                     | 2.02E-10    | ****  | 4.17%                | 0.11934     |       | 92.44%            | 3.14E-05    | ****  | 4.45%                      | 0.1248      |       | 0.73%          | 0.41106     |       | 20.92%               | 1.81E-44    | ****  |
| <b>AZI R</b>          | 98.66%                     |             |       | 2.00%                |             |       | 96.88%            |             |       | 2.23%                      |             |       | 0.00%          |             |       | 3.23%                |             |       |

| Locus                | NEIS3224       |             |       | NEIS3226         |             |       | NEIS3228             |             |       | NEIS3232               |             |       | NEIS3233             |             |       | NEIS3234             |             |       |
|----------------------|----------------|-------------|-------|------------------|-------------|-------|----------------------|-------------|-------|------------------------|-------------|-------|----------------------|-------------|-------|----------------------|-------------|-------|
| Funtional annotation | Phage island X |             |       | Membrane protein |             |       | Hypothetical protein |             |       | Toxin-antitoxin system |             |       | Hypothetical protein |             |       | Hypothetical protein |             |       |
|                      | prevalence     | adj.p-value | sign. | prevalence       | adj.p-value | sign. | prevalence           | adj.p-value | sign. | prevalence             | adj.p-value | sign. | prevalence           | adj.p-value | sign. | prevalence           | adj.p-value | sign. |
| <b>PEN S</b>         | 8.55%          | 2.85E-09    | ****  | 0.85%            | 1           |       | 95.73%               | 0.1794      |       | 18.80%                 | 1.78E-118   | ****  | 85.47%               | 4.79E-18    | ****  | 98.29%               | 0.9048      |       |
| <b>PEN I</b>         | 0.58%          |             |       | 0.74%            |             |       | 95.62%               |             |       | 24.79%                 |             |       | 96.99%               |             |       | 99.89%               |             |       |
| <b>PEN R</b>         | 0.00%          |             |       | 0.37%            |             |       | 97.95%               |             |       | 67.50%                 |             |       | 88.92%               |             |       | 99.72%               |             |       |
| <b>TET S</b>         | 1.81%          | 1.80E-04    | ***   | 1.42%            | 0.037674    | *     | 96.51%               | 0.8268      |       | 16.93%                 | 3.44E-54    | ****  | 97.03%               | 2.80E-04    | ***   | 99.74%               | 1           |       |
| <b>TET R</b>         | 0.14%          |             |       | 0.23%            |             |       | 98.18%               |             |       | 48.06%                 |             |       | 92.58%               |             |       | 99.77%               |             |       |
| <b>CIP S</b>         | 1.57%          | 1.50E-09    | ****  | 1.33%            | 6.40E-08    | ****  | 92.56%               | 1           |       | 9.77%                  | 6.22E-271   | ****  | 97.66%               | 1.02E-20    | ****  | 93.66%               | 1           |       |
| <b>CIP R</b>         | 0.00%          |             |       | 0.00%            |             |       | 92.79%               |             |       | 59.93%                 |             |       | 90.98%               |             |       | 94.08%               |             |       |
| <b>CRO S</b>         | 0.72%          | 1           |       | 0.60%            | 1           |       | 92.15%               | 1           |       | 35.62%                 | 0.011076    | *     | 94.04%               | 1           |       | 93.28%               | 1           |       |
| <b>CRO R</b>         | 0.00%          |             |       | 0.00%            |             |       | 86.36%               |             |       | 77.27%                 |             |       | 100.00%              |             |       | 100.00%              |             |       |
| <b>CFX S</b>         | 0.77%          | 1           |       | 0.67%            | 1           |       | 94.63%               | 1           |       | 32.72%                 | 1.61E-59    | ****  | 92.58%               | 4.76E-14    | ****  | 99.83%               | 1           |       |
| <b>CFX R</b>         | 0.00%          |             |       | 0.00%            |             |       | 92.04%               |             |       | 71.63%                 |             |       | 100.00%              |             |       | 99.80%               |             |       |
| <b>AZI S</b>         | 0.82%          | 0.15834     |       | 0.65%            | 0.63492     |       | 92.73%               | 2.29E-07    | ****  | 36.23%                 | 4.24E-04    | ***   | 93.46%               | 4.57E-10    | ****  | 91.20%               | 3.26E-20    | ****  |
| <b>AZI R</b>         | 0.00%          |             |       | 0.00%            |             |       | 97.66%               |             |       | 44.54%                 |             |       | 98.66%               |             |       | 99.11%               |             |       |
